1 Title:

2 **Proteasome inhibitor-induced modulation reveals the spliceosome as a**  
3 **specific therapeutic vulnerability in multiple myeloma**

4

5 **Authors:**

6 Hector H. Huang<sup>1</sup>, Ian D. Ferguson<sup>1</sup>, Alexis M. Thornton<sup>2</sup>, Christine Lam<sup>1</sup>, Yu-  
7 Hsiu T. Lin<sup>1</sup>, Prabhakar Bastola<sup>1</sup>, Priya Choudhry<sup>1</sup>, Margarette C. Mariano<sup>1</sup>,  
8 Makeba Marcoulis<sup>1</sup>, Julia Malato<sup>3</sup>, Paul Phojanakong<sup>3</sup>, Thomas G. Martin<sup>4</sup>,  
9 Jeffrey L. Wolf<sup>4</sup>, Sandy W. Wong<sup>4</sup>, Nina Shah<sup>4</sup>, Byron C. Hann<sup>3</sup>, Angela N.  
10 Brooks<sup>2</sup>, Arun P. Wiita<sup>1,3,\*</sup>

11

12 **Affiliations:**

13 <sup>1</sup>Dept. of Laboratory Medicine, University of California, San Francisco, CA <sup>2</sup>Dept.  
14 of Biomolecular Engineering, University of California, Santa Cruz, CA, <sup>3</sup>Helen  
15 Diller Family Comprehensive Cancer Center, University of California, San  
16 Francisco, CA, <sup>4</sup>Dept. of Medicine, University of California, San Francisco, CA

17

18 **Running Title:**

19 PI response reveals spliceosome as therapeutic target in MM

20

21 **Keywords:**

22 myeloma, proteasome inhibitor, phosphoproteomics, splicing, mass spectrometry

23

24 **Financial support:**

25 This work was supported by NIH/NCI P30CA083103 supporting UCSF Preclinical  
26 Therapeutic Core facility managed by B.C.H.), NIH/NHGRI T32HG008345 (to  
27 A.M.T.), the Damon Runyon Cancer Research Foundation Dale Frey  
28 Breakthrough Award (DFS 14-15), NIH/NCI K08CA184116, NIH/NIGMS  
29 DP2OD022552, and the UCSF Stephen and Nancy Grand Multiple Myeloma  
30 Translational Initiative (to A.P.W.) and NIH/NCI R01CA226851 (to A.N.B. and  
31 A.P.W.)

1

2 **Declaration of Interests**

3 The authors declare no relevant conflicts of interest.

4

5 **\*Corresponding Author Contact information:**

6 Arun P. Wiita, MD, PhD

7 tel: (415) 514-6238

8 fax: (415) 353-4877

9 [Arun.wiita@ucsf.edu](mailto:Arun.wiita@ucsf.edu)

10 UCSF Dept. of Laboratory Medicine

11 185 Berry St., Ste. 290

12 San Francisco, CA 94107

13

14

1 **Abstract:**

2 Enhancing the efficacy of proteasome inhibitors is a central goal in myeloma  
3 therapy. We proposed that signaling-level responses after PI would reveal new  
4 mechanisms of action that could be therapeutically exploited. Unbiased  
5 phosphoproteomics after the PI carfilzomib surprisingly demonstrated the most  
6 prominent phosphorylation changes on splicing related proteins. Spliceosome  
7 modulation was invisible to RNA or protein abundance alone. Transcriptome  
8 analysis after PI demonstrated broad-scale intron retention, suggestive of  
9 spliceosome interference, as well as specific alternative splicing of protein  
10 homeostasis machinery components. These findings led us to evaluate direct  
11 spliceosome inhibition in myeloma, which synergized with carfilzomib and  
12 showed potent anti-tumor activity. Functional genomics and exome sequencing  
13 further supported the spliceosome as a specific vulnerability in myeloma. Our  
14 results propose splicing interference as an unrecognized modality of PI  
15 mechanism, reveal additional modes of spliceosome modulation, and suggest  
16 spliceosome targeting as a promising therapeutic strategy in myeloma.

17

18 **Significance:**

19 New ways to enhance PI efficacy are of major interest. We combine systems-  
20 level analyses to discover that PIs specifically interfere with splicing and that  
21 myeloma is selectively vulnerable to spliceosome inhibition. We reveal a new  
22 approach to advance myeloma therapy and uncover broader roles of splicing  
23 modulation in cancer.

24

25 **Keywords:**

26 Mass Spectrometry, Proteomics, Splicing, Alternative Splicing,  
27 Phosphoproteomics, Myeloma, Spliceosome, SF3B1, SRSF1

28

## 1 INTRODUCTION

2 Multiple myeloma is a clonal malignancy of plasma cells with no known  
3 cure. Like normal plasma cells, myeloma cells produce and secrete incredible  
4 amounts of immunoglobulin. This unique function may be exploited by  
5 therapeutically inhibiting the proteasome using the FDA-approved proteasome  
6 inhibitors (PIs) bortezomib, carfilzomib, and ixazomib. Proteotoxic stress caused  
7 by these first-line therapeutic agents has been proposed to induce the apoptotic  
8 function of the unfolded protein response (UPR) (1), leading to plasma cell death  
9 while largely sparing normal tissues (2, 3). However, despite the appealing  
10 simplicity of this mechanism, the canonical UPR is not always strongly induced in  
11 myeloma cells by PIs (4) and is unlikely to be the sole mode of PI cytotoxicity in  
12 MM. Indeed, many additional mechanisms of action of PIs have also been  
13 proposed, ranging from NF- $\kappa$ B inhibition to immune microenvironment effects to  
14 aberrant recycling of cytosolic amino acids (5, 6).

15 Identifying the full range of PI mechanisms of action remains relevant  
16 given that acquired PI resistance is clinically widespread but its origins remain  
17 unclear (7, 8) and finding new methods to specifically target PI-resistant disease,  
18 or molecules to synergize with PIs to avoid resistance by driving deeper  
19 remissions, remains a long-standing goal. As one approach to achieving this  
20 goal, we and others have studied the response of malignant plasma cells to PIs  
21 using both gene expression and proteomic methods (9-11). Notably, one of the  
22 most prominent features of the cellular response to PIs is the activation of the  
23 heat shock response (12). This mechanism leads to significant induction of  
24 cytosolic protein-folding chaperones, possibly to assist in protein refolding and  
25 decrease in unfolded protein stress. We and others (9, 12, 13) have therefore  
26 proposed targeting mediators of the heat shock response as potential  
27 combination therapies with PIs.

28 However, one unresolved question is whether proteasome inhibition may  
29 carry additional effects on plasma cells that are not revealed by mRNA or protein  
30 abundance analysis alone. We hypothesized that additional modalities of  
31 response, and thereby new myeloma-relevant therapeutic targets, may be

1 revealed by studying the signaling-level response to PIs with unbiased mass  
2 spectrometry-based phosphoproteomics. The large majority of therapy-relevant  
3 investigations using this technique have focused on elucidating the effects of  
4 kinase inhibitors (14). However, we reasoned that a significant cellular  
5 perturbation such as proteasome inhibition would likely also indirectly perturb  
6 kinase and phosphatase signaling in a broad fashion.

7 Here, we used unbiased phosphoproteomics to quantify >5000  
8 phosphopeptides in myeloma cells exposed to the irreversible PI, carfilzomib  
9 (Cfz). Surprisingly, we found the greatest increases in phosphorylation occurred  
10 in proteins associated with the spliceosome machinery. A link between these  
11 processes was invisible at the gene expression level. We further evaluated this  
12 link from a mechanistic and therapeutic perspective, finding that PIs lead to  
13 specific disruption of normal splicing. We suggest interference of splicing as an  
14 additional mechanism of action of PIs not previously explored. Inhibition of  
15 splicing has recently become a promising therapeutic strategy in other  
16 hematologic malignancies (15). Our results reveal an intersection of cellular  
17 stress and the splicing machinery, which may have broad relevance in biology.  
18 Furthermore, we propose the spliceosome as a new and potentially selective  
19 therapeutic target in myeloma.

20

## 21 **RESULTS**

22

### 23 **Proteasome inhibition results in sustained phosphorylation of splicing** 24 **factors in myeloma plasma cells**

25 We first used unbiased phosphoproteomics to examine the signaling-level  
26 response of MM.1S multiple myeloma cells to Cfz. We chose time points across  
27 24 hours for analysis based on our prior results demonstrating that the  
28 transcriptional and proteomic response to proteasome inhibition evolves over  
29 many hours (9). This is in contrast with the majority of prior perturbation  
30 phosphoproteomic studies, which have typically examined direct effects on  
31 kinase activation or inhibition on a timescale of minutes (14). Here, we instead

1 consider the indirect effects on phosphorylation induced by PI exposure. Using  
2 label-free quantification of immobilized metal affinity chromatography (IMAC)-  
3 isolated phosphopeptides, we indeed found that altered phosphorylation  
4 signatures were most prominent 24 hours after treatment (**Fig. 1 and Fig. S1**). In  
5 total, we quantified 5791 phosphosites in at least one technical replicate of the  
6 time course, with >99% of phosphosites representing Ser or Thr phosphorylation  
7 events, as expected using this enrichment technique. Notably, with 30 nM Cfz,  
8 cell viability was approximately 30% of baseline, indicating significant drug-  
9 induced cytotoxicity by this final time point.

10 At each time point we simultaneously performed single-end RNA-seq to  
11 determine gene expression to compare with our phosphoproteomic results. **Fig.**  
12 **1B** shows 58 upregulated (red) and 75 downregulated (blue) phosphopeptides  
13 from proteins with largely unchanged RNA transcript abundance as detected by  
14 unsupervised hierarchical clustering. Upon this initial analysis, we were  
15 encouraged to find decreased phosphorylation of the translation factor EIF4E-  
16 BP1 as well as the ribosomal subunit RPS6 (**Fig. 1B**). These phosphorylation-  
17 level responses related to suppressed translation are expected upon PI-induced  
18 cellular stress (9). While other downregulated phosphopeptides did not suggest a  
19 specific highly-enriched biological function, upon manual inspection of  
20 upregulated phosphosites we were surprised to find that 14 of 58 were present  
21 on proteins related to pre-mRNA splicing. These primarily included  
22 phosphopeptides deriving from the heterogeneous ribonucleoprotein (HNRNP)  
23 family of proteins as well as phosphopeptides belonging to the SRSF family of  
24 splicing factors (**Fig. 1B**). In particular, the arginine- and serine-rich “RS” domain  
25 of the SRSF proteins are known to have their splicing activity modulated by  
26 phosphorylation (16). Notably, these prominent signaling-level effects on splicing  
27 factors were invisible to prior gene expression studies of PI response and have  
28 not been investigated previously. We therefore chose to further explore the  
29 interaction between PIs and the splicing machinery.

30 To validate this initial result from label free quantitative proteomics, we  
31 prepared independent samples using a stable isotope labeling (SILAC)

1 phosphoproteomics approach. Based on our results above, we examined only  
2 the 24 hr time point in MM.1S cells. We evaluated both a low dose (10 nM,  $n = 2$   
3 biological replicates) and a moderate dose (18 nM,  $n = 2$ ) of Cfz (**Fig. 2A-B**).  
4 With this lot of Cfz, 10 nM drug elicited ~20% cell death after 24 hr, while 18 nM  
5 killed ~85% of cells (**Fig. S3A**). Of the 520 phosphosites significantly ( $p < 0.05$ ;  $\geq$   
6 2-fold-change) upregulated in MM.1S treated with 18 nM Cfz in **Fig. 2A**, 127  
7 (24.4%) are associated with splicing-related proteins, with 23 of these as part of  
8 the SRSF protein family of splicing factors. Background-corrected Gene Ontology  
9 (GO) analysis confirms that all of the top enriched biological processes involve  
10 RNA splicing regulation and mRNA processing (**Fig. S1B, 2E**). At 10 nM Cfz,  
11 though, this signaling response is much weaker with only 25 upregulated  
12 phosphosites; none of these are splicing-related. These results suggest that  
13 there is a strong dose-response effect of phosphorylation changes after  
14 proteasome inhibition, both across splicing factors and the broader proteome.

15 To compare these changes at the signaling level to changes at the protein  
16 level, unenriched peptides were also analyzed by LC-MS/MS (**Fig. S2A-B**).  
17 Confirming expected responses to proteasome inhibition, the most upregulated  
18 proteins included heat shock-induced chaperones as well as SQSTM1/p62  
19 associated with autophagy (9). In contrast, splicing factors with increased  
20 phosphorylation sites do not significantly change in abundance, confirming that  
21 phosphosite increases are due to changes at the signaling level and not protein  
22 copy number.

23

## 24 **Melphalan induces a similar but not identical phosphorylation response**

25 We next investigated whether this broad splicing factor phosphorylation  
26 phenotype was unique to proteasome inhibition or was also seen under a  
27 different drug mechanism of action. We chose to compare the response of  
28 MM.1S cells to melphalan, a DNA alkylating agent and clinically-used myeloma  
29 therapeutic. In parallel, we also treated another MM cell line, AMO-1, with Cfz to  
30 determine if the phosphorylation response to proteasome inhibitor is consistent  
31 across cell line models.

1 For these experiments we again used a single-timepoint SILAC approach.  
2 Here, both 10  $\mu$ M melphalan and 15 nM Cfz led to ~20% cell death in MM.1S  
3 and AMO-1, respectively, at 24 hr (**Fig. S3A**). Western blot confirmed induction  
4 of DNA damage by melphalan and proteotoxic stress response for Cfz (**Fig. S3C-**  
5 **D**). Compared to 18 nM Cfz, we saw largely decreased phosphorylation-level  
6 responses to both of these agents (**Fig. 2C-D**). Of 113 phosphosites significantly  
7 upregulated in AMO-1, 7 belong to splicing related proteins (SRSF2, SRSF6,  
8 SRRM1, HNRNPH1, TRA2A, DDX1). This result is consistent with the MM.1S  
9 results in **Fig. 2A-B**, where greater PI response correlates with more prominent  
10 phosphorylation changes.

11 Under 10  $\mu$ M melphalan, 93 phosphosites were significantly upregulated,  
12 with 8 sites on splicing related proteins (HNRNPK, TRA2A, SRRM2, and  
13 WDR77), although none are SRSF family members (**Fig. 2D**). Furthermore, as  
14 expected, both unenriched shotgun proteomics and RNA-seq for gene  
15 expression confirm that proteasome inhibition and DNA damage elicit different  
16 responses (**Fig. S2A-E**). Again, no splicing factors with altered phosphosites  
17 under either drug treatment were changed at the protein abundance level.

18 We further performed Kinase Set Enrichment Analysis (KSEA) (17) on our  
19 MM.1S datasets to identify kinases whose activity may regulate differential  
20 phosphorylation found by phosphoproteomics. While this tool is limited by its  
21 reliance on well-characterized kinase-substrate relationships, and despite the  
22 different number of phosphosites upregulated under each condition, within this  
23 framework this tool identified similar kinases active under both 18 nM Cfz and 10  
24  $\mu$ M melphalan treatment (**Fig. 2F**). Notably, both drugs are predicted to induce  
25 activity of cdc2-like kinase 1 (CLK1), a kinase known to phosphorylate SRSF  
26 family splicing factors among other proteins (18). However, in line with the  
27 specific biology of PIs, Cfz also strongly induced inhibitory kappa B kinase  
28 (IKBKB) activity, a kinase leading to NF- $\kappa$ B inhibition after PI treatment (19).  
29 Taken together, these results indicate that drug-induced stress may broadly lead  
30 to phosphorylation of splicing factors, though precise patterns of phosphorylation  
31 may differ in a drug-specific manner.



1

## 2 **SRSF splicing factors appear highly phosphorylated at baseline in MM cells**

3 To investigate our phosphoproteomic results via an orthogonal method,  
4 we performed Western blots to evaluate for phosphorylation-induced gel mobility  
5 shift after Cfz treatment of SRSF1, SRSF3, and SRSF6. After Cfz treatment and  
6 isolation of the cytoplasm, we initially saw no discernable shift of these proteins.  
7 However, treatment of lysate with calf alkaline phosphatase resulted in a  
8 substantial shift of SRSF proteins but not actin (**Fig. S3F**). Therefore, these  
9 SRSF factors exist in a highly phosphorylated state even at baseline in MM  
10 plasma cells. Upregulated phosphorylation post-Cfz identified by mass  
11 spectrometry may therefore represent additional phosphorylation at only selected  
12 phosphosites. While these changes in phosphorylation may still result in  
13 biological effects, Cfz-induced modulation does not appear to reflect a dramatic  
14 shift in the overall phosphorylation status of these SRSF proteins in this system.

15 To further investigate baseline phosphorylation status of SRSF proteins,  
16 we treated MM.1S cells with 50  $\mu$ M KH-CB19 (20), a reported highly selective  
17 inhibitor of the SRSF kinases CLK1 and CLK4 ( $K_D = 20$  nM vs. CLK1). We did  
18 not observe any viability effects in MM.1S even at this high concentration (**Fig.**  
19 **S3A**). Unbiased phosphoproteomics after 24 hr of KH-CB19 treatment  
20 surprisingly showed no significant change in phosphorylation status of any  
21 quantified SRSF phosphosites, except one upregulated (**Fig. S2F**). These results  
22 suggest that other kinases also play a role in maintaining SRSF phosphorylation  
23 in this system, either at baseline or via feedback mechanisms after sustained  
24 CLK1 inhibition.

25

## 26 **Proteasome inhibition induces intron retention in MM cells**

27 Given our results demonstrating splicing factor phosphorylation, we next  
28 investigated whether pre-mRNA splicing itself was altered after drug treatment.  
29 We obtained paired-end sequencing data from polyA-enriched RNA on the same  
30 samples used for phosphoproteomics, plus one additional biological replicate ( $n$   
31 = 3 total) of each of the following: MM.1S treated with 18 nM Cfz, with 10  $\mu$ M

1 melphalan, and with DMSO as control; and AMO-1 treated with 15 nM Cfz and  
2 with DMSO as control. We used JuncBASE (21) to process the aligned  
3 sequencing data by identifying and quantifying both annotated and novel splice  
4 junctions. Data for each alternative splicing event was evaluated using the  
5 standard measure of “percent spliced in” or PSI ( $\psi$ ) (**Fig. 3A**).

6 Comparative analysis of differential PSI ( $\Delta$ PSI) between 18 nM Cfz- and  
7 DMSO-treated MM.1S were considered according to categories including  
8 alternative exon acceptor (3' splice site selection), alt. donor (5' splice site  
9 selection), alt. last exon, alt. first exon, alt. exon cassette, and intron retention  
10 (IR) (**Fig. 3B, Supplementary Table S3**). The  $\Delta$ PSI distribution for IR  
11 demonstrated the greatest positive shift after Cfz treatment ( $n = 25,807$  total IR  
12 events measured; median = 2.54).  $\Delta$ PSI medians for alternative splice site  
13 selection also demonstrated a significant shift (alt. donor median = 1.64,  $n =$   
14 9,188 and alt. acceptor median = 0.81,  $n = 9,352$ ). All other categories were  
15 closer to a median of zero ( $p < 2.2E-16$  for median of IR distribution, alt. donor,  
16 and alt. acceptor vs. median of cassette by Mann-Whitney test, **Supplementary**  
17 **Table S3**). Intriguingly, PIs are well known to induce a strong heat shock  
18 response (12) and prior work in non-cancer cells demonstrated that heat shock  
19 alone could impair splicing and induce IR without broadly affecting other  
20 alternative splicing events (22, 23). In general, intron-retained transcripts may be  
21 subject to nonsense-mediated decay or retained in the nucleus where they  
22 remain untranslated. Our results suggest that a similar splicing impairment may  
23 be present in MM cells exposed to PI.

24 We then considered the possibility that the IR phenotype results from a  
25 global dysfunction of the splicing machinery during drug-induced apoptosis,  
26 which is likely occurring with ~85% cell death at our high-dose Cfz treatment. Our  
27 prior proteomic data indicated that SF3B1 and U2AF2, core components of the  
28 splicing machinery, are some of the earliest substrates cleaved by caspases  
29 during PI-induced apoptosis (9). Indeed, by Western blotting we validated that  
30 SF3B1 and U2AF2 are proteolytically cleaved after Cfz treatment and this  
31 cleavage can be blocked by the pan-caspase inhibitor zVAD-fmk (**Fig. S3E**).

1 These caspase cleavage events, then, could be responsible for the IR  
2 phenomenon.

3 However, we found a similar shift in IR distribution in AMO-1 cells treated  
4 with 15 nM Cfz ( $n = 27,386$ ; median = 2.2) (**Fig. 3C**) despite much less cytotoxicity  
5 (~20%) than the 18 nM Cfz treatment in MM.1S. As caspase cleavage correlates  
6 with degree of cell death, it therefore appears unlikely that cytotoxicity alone is  
7 responsible for IR. Notably, an even smaller shift was observed in IR for MM.1S  
8 with 10  $\mu$ M melphalan treatment, also at ~20% cytotoxicity ( $n = 24,247$ ; median =  
9 0.44;  $p < 2.2E-16$  for IR distribution MM.1S 18 nM Cfz vs 10  $\mu$ M melphalan).  
10 Instead, after melphalan the greatest  $\Delta$ PSI shift occurred with alt. exon cassettes  
11 (single cassette median = 1.06,  $n = 12,267$ , coordinated cassette median = 1.75,  
12  $n = 1,417$ , **Fig. 3D**). Even if we only consider statistically significant IR events ( $p$   
13  $< 0.05$ ), the  $\Delta$ PSI distributions for the drug responses remain distinct (**Fig. S4A-**  
14 **B**). **Fig. 3E** compares the GO enrichment of all significant ASEs induced by Cfz  
15 and by melphalan and shows divergent classes of genes alternatively spliced.  
16 Therefore, while melphalan also affects alternative splicing it appears to do so via  
17 a different mechanism than Cfz (24).

18 Intriguingly, in the case of AMO-1 treated with 15 nM Cfz, we noticed the  
19  $\Delta$ PSI shift for alternative splice sites (alt. acceptor median = 0.40,  $n = 9,620$ ; alt.  
20 donor median = 0.61,  $n = 8,116$ , **Fig. 3C**, **Supplementary Table S3**) were  
21 decreased compared to MM.1S treated with 18 nM Cfz. Notably, this finding also  
22 correlates with the lesser degree of splicing factor phosphorylation (**Fig. 2**).  
23 These findings illustrate a more pronounced IR phenotype after PI than DNA  
24 damage, irrespective of the amount of cell death, while alternative exonic splice  
25 site determination may be a dose-response behavior.

26

## 27 **Exogenous expression of SRSF1 wildtype and RS-domain mutants do not** 28 **significantly alter splicing patterns**

29 Having shown that proteasome inhibition can lead to both robust splicing  
30 factor phosphorylation as well as widespread IR of pre-mRNA, we next  
31 considered whether these processes are causally linked or whether they instead

1 occur via parallel mechanisms. To initially investigate this question, we  
2 considered SRSF1 (also known as SF2 or ASF), a well-characterized member of  
3 the SR family of splicing factors and a putative proto-oncogene (16, 25). All  
4 members of this family contain RNA recognition motifs (RRM) and arginine- and  
5 serine-rich domains (RS) (16). In general, SR proteins recognize *cis*-acting splice  
6 enhancers on pre-mRNA and work to promote splicing by initially recruiting the  
7 spliceosome to these intron-exon junctions (16). We found that SRSF1  
8 demonstrates upregulated phosphorylation at sites in both the RS1 and RS2  
9 domain when MM cells are treated with Cfz (**Fig. 2A, Supplementary Table S4**).  
10 The current model of SRSF1 function suggests that 1) SR-protein kinases  
11 (SRPK)-mediated phosphorylation of RS domain leads to translocation into the  
12 nucleus, 2) further hyperphosphorylation by CLK1 causes association with the  
13 U1 spliceosome, and 3) partial dephosphorylation is required for splicing  
14 catalysis (16, 26, 27).

15 To study the effects of SRSF1 phosphorylation in MM, we exogenously  
16 expressed a wildtype (SRSF1-WT), phosphomimetic (SRSF1-SD), or  
17 phosphodead (SRSF1-SA) variant in AMO-1 plasma cells. We assumed an all-  
18 or-none model of SR protein phosphorylation, where exogenous SRSF1 mutants  
19 have all 20 serines in the RS1 and RS2 domains replaced with either an  
20 aspartate (SD) or an alanine (SA). Exogenously expressed SRSF1 proteins are  
21 tagged with a C-terminal mCherry, nuclear localization signal (NLS) and 3x  
22 FLAG-peptide (**Fig. 4A**). It is known that phosphorylation of the RS1 domain is  
23 necessary for nuclear localization (28, 29); the attempted forced nuclear  
24 localization of the SA mutant was chosen to probe potential splicing-level effects  
25 of phospho-dead SRSF1 interacting with the spliceosome. Immunoblot confirms  
26 expression of exogenous SRSF1 constructs, which migrate higher than  
27 endogenous SRSF1 (**Fig. S4E**), and demonstrates lower expression than the  
28 high-abundance endogenous protein. Epi-fluorescent images in **Fig. 4B** show the  
29 distribution of exogenous SRSF1-WT, SD, and SA mutants. Notably, most of WT  
30 and SD signal is localized to the nucleus, suggestive of functional protein product  
31 and consistent with expected biology. However, a much larger fraction of SA

1 mutant is trapped in the cytosol despite NLS tagging. Consistent with prior work  
2 (30, 31), this finding suggests that phosphorylation of RS domains is a major  
3 requirement for entry into the nucleus.

4       Upon JuncBASE analysis of poly-A RNA-seq data from DMSO-treated  
5 WT, SD, and SA construct ( $n = 3$  for each), we saw remarkably few global  
6 differences in PSI as a function of modeled SRSF1 phosphorylation status (**Fig.**  
7 **4D**). Notably, our results in **Fig. 1B** suggested that phosphorylation of multiple  
8 splicing factors, including other SRSF proteins, occurs simultaneously under Cfz-  
9 induced stress; we find that altered phosphorylation of SRSF1 alone may not  
10 carry any significant effects.

11

### 12 **SRSF1 RS-domain phosphomimetic mutant demonstrates weakened** 13 **interaction with the spliceosome**

14       Though we cannot draw a direct link between SRSF1 phosphorylation  
15 status and specific alternative splicing events, we further investigated the diverse  
16 biological roles of SRSF1. In addition to modulating pre-mRNA splicing, these  
17 include regulating nuclear export of spliced mRNAs and translational regulation  
18 in the cytosol via interaction with the ribosome (32-34). Using the 3x-FLAG tag  
19 on constructs we performed affinity purification mass spectrometry (AP-MS) with  
20 label-free quantitative proteomics vs. an mCherry-NLS-[FLAG]<sub>3</sub> control. We  
21 specifically evaluated differential binding partners of SRSF1 as a function of  
22 phosphorylation status across both the nuclear and cytoplasmic compartments.

23       While clear differences were observed between the nuclear and cytosolic  
24 interactome for each construct, overall biological signatures based on GO  
25 analysis were surprisingly similar across WT, SD, and SA within each  
26 compartment (**Fig. S5B, D, F**). Notably, in the cytosol we found consistent  
27 interactions between both SRSF1-WT and SRSF1-SD with several RNA-binding  
28 proteins as well as components of the translational machinery. We do note one  
29 stark difference between WT and the phosphomimetic mutant in the nuclear  
30 fraction: the WT construct showed direct evidence of interaction with several  
31 small nuclear ribonucleoprotein (snRNP) polypeptides, core components of the

1 U1-U2 spliceosome (**Fig. 4E**). Unexpectedly, these nuclear interactions were not  
2 enriched in the SD construct, which instead interacted with other splicing-related  
3 factors such as TRA2A, TRA2B, and PABPN (**Fig. 4F**). This interactome  
4 mapping may help refine the current model of SRSF1 biology, which suggests  
5 that hyperphosphorylation of RS domains leads to preferential integration with  
6 the U1 spliceosome (35, 36) and would explain the lack of change seen in global  
7 alternative splicing in the SD expressing cells.

8

### 9 **Proteasome inhibition of MM cells results in both stochastic intron** 10 **retention and specific alternative exon usage**

11 We next explored the splicing-level effects of 15 nM Cbz treatment on  
12 AMO-1 cells expressing the WT, SD, and SA constructs. Notably, in this setting  
13 cytotoxicity at 24 hr was <10% in 8 of 9 total replicates (**Fig. S4D**). Compared to  
14 DMSO-treated samples (**Fig. 4C**), Cbz again elicited a response consistent with  
15 that found in **Fig. 3C**: despite minimal cell death, we observed a clear shift in the  
16 median  $\Delta$ PSI toward increased global IR ( $n = 12,139$ ; median = 2.45,  $p < 2.2E-16$   
17 for one-sample Wilcoxon summed rank test). These findings in the absence of  
18 apoptosis underscore that caspase cleavage of splicing factors is unlikely to be a  
19 primary mechanism of IR after PI.

20 The combined RNA-seq dataset of all Cbz-treated samples vs. DMSO for  
21 these additional SRSF1 constructs were analyzed together (**Fig. 5A**) with  
22 JuncBASE ( $n = 24$  replicates total across all AMO-1, including data in **Fig. 3C**,  
23 **4C**). With this increased statistical power, we were able to identify *CNNM3*, which  
24 encodes a divalent metal cation transporter, as showing among the strongest  
25 signatures of IR across all events (FDR-corrected  $p = 0.032$ ) (**Fig. S4G**).  
26 However, despite detecting  $n = 22,559$  IR events by JuncBASE (**Fig. 5B, left**),  
27 very few individual transcripts ( $n = 43$ , including *CNNM3*) showed statistically  
28 significant (FDR-corrected  $p < 0.05$ ) IR across replicates (**Fig. 5B, right**). This  
29 finding suggests that Cbz-induced IR may be a stochastic process, perhaps  
30 resulting from general interference with the splicing machinery without a coherent  
31 selection for specific transcripts.

1           In contrast, alternative exon splice site usage (alternative exon donor ( $n =$   
2 1134) and alternative exon acceptor ( $n = 810$ )) emerged as the dominant type of  
3 alternative splicing when considering only statistically significant events (**Fig.**  
4 **5B**). We investigated whether these consistently observed alternative splicing  
5 events may carry some biological relevance. Interestingly, GO enrichment  
6 analysis of all the genes undergoing significant alternative splicing after Cfz ( $n =$   
7 2,575 events total across all categories in **Fig. 5B, right**) revealed ‘proteasome-  
8 mediated ubiquitin-dependent protein catabolic process’ ( $p = 2.08E-16$ ) and  
9 ‘protein polyubiquitination’ ( $p = 1.39E-13$ ) as highly enriched (**Fig. 5C**). Notably,  
10 multiple proteasome subunits (*PSMA3/5/7*, *PSMB4/5*, *PSMC1/4/5*, *PSMD1-4*,  
11 *PSME2*), the protein homeostasis node p97 (*VCP*), and ubiquitin (*UBB*, *UBC*) all  
12 undergo some degree of alternative splicing with Cfz (example in **Fig. 5D**). These  
13 findings raise the possibility that alternative splicing may modulate the protein  
14 homeostasis machinery in response to therapeutic proteasome inhibition.

15           Taken together, our results offer a model for the effects of proteasome  
16 inhibition on the splicing machinery in myeloma (**Fig. 5E**). Upon therapeutic  
17 insult, the stress response induces phosphorylation of multiple splicing factors.  
18 Though the effect of this phosphorylation on specific splicing events remains  
19 unclear, these events may relate to specific alterations in exon usage based on  
20 known SRSF biochemistry. Our analysis of specific exon usage suggests that  
21 modification of the proteasome itself via alternative splicing may play a role in  
22 adaptation or resistance to proteasome inhibitor. In parallel, we observe a broad  
23 increase in the number of stochastically distributed IR events. These IR events,  
24 expected to reduce the number of functional protein products, may work to  
25 generally reduce proteotoxic stress and conserve cellular resources normally  
26 devoted to protein synthesis, thereby playing a role in adaptation to proteasome  
27 inhibition. Alternatively, the intron retention phenotype may indicate malfunction  
28 of the spliceosome, an essential process whose loss reduces tumor cell fitness.  
29 Interference with splicing may therefore be a previously unappreciated part of the  
30 PI mechanism of action.

31

## 1 **The spliceosome inhibitor E7107 is broadly potent versus MM cells and** 2 **synergistic with proteasome inhibitor**

3 Extending from this potential new mechanism of action of PIs as  
4 interfering with splicing, we further investigated the therapeutic potential of more  
5 dramatic spliceosome disruption in myeloma. For our preclinical studies we  
6 employed the tool compound E7107, a pladienolide B analog and direct inhibitor  
7 of the core U2 catalytic spliceosome component SF3B1 (15). This molecule has  
8 recently been described to induce extreme IR and strong cytotoxic effects versus  
9 models of myeloid malignancy, particularly those carrying mutations within  
10 splicing factors (37).

11 Using both qPCR validation of canonical IR events after SF3B1 inhibition  
12 (38) (**Fig. S6B**) as well as JuncBASE analysis of RNA-seq data (**Fig. 6A**), as  
13 expected we identified very significant IR after 6h of 10 nM E7107 treatment in  
14 MM.1S cells ( $\Delta$ PSI median = 13.79,  $n = 30,666$ ). There was no noted cytotoxicity  
15 at this early time point (**Fig. S6A**). This finding supports the previous conclusion  
16 that splicing impairment, not apoptosis, induces IR. However, unlike the PI  
17 response, we also observed massive global loss of cassette exon splicing under  
18 E7107 ( $\Delta$ PSI median = -16.6,  $n = 24,053$ , **Fig. S6D**). Furthermore, the number of  
19 significant ( $p < 0.05$ ) IR events remained very high with E7107 ( $n = 7,171$ ), unlike  
20 the apparently stochastic IR events seen with PI (**Fig. S6C**). Altogether, this  
21 suggests that PI-induced impairment of splicing is a partial interference of normal  
22 splicing operations, unlike the total abrogation of splicing seen with E7107.

23 Underscoring the potential of splicing inhibition as a therapeutic strategy in MM,  
24 E7107 was extremely potent versus a panel of seven MM cell lines treated for 48  
25 hr, with  $LC_{50}$ 's ranging from  $<1$  nM to 30 nM (**Fig. 6B**). In addition, a PI-resistant  
26 AMO-1 cell line (39) showed very similar sensitivity to E7107 as the parental line  
27 (**Fig. 6C**). This finding suggests the potential for clinical utility of splicing inhibition  
28 even in PI-refractory disease.

29 We noted that our MM cell line sensitivities appeared essentially bimodal,  
30 with one group of more sensitive lines with  $LC_{50}$ 's of  $<1$  nM and another slightly  
31 less sensitive group of cell lines with  $LC_{50}$  of 20-50 nM. In an attempt to identify



1 potential determinants of this differential drug sensitivity, we examined publicly  
2 available RNA-seq data of baseline gene expression in MM cell lines  
3 ([www.keatslab.org](http://www.keatslab.org)). We were intrigued to find that the more sensitive lines  
4 demonstrated significantly higher RNA expression of *SF3B1* (**Fig. 6D**). This  
5 outcome hinted that more sensitive cell lines may somehow be more “addicted”  
6 to SF3B1, leaving them more vulnerable to splicing inhibition, as well as  
7 revealing a potential biomarker that could be used for patient stratification.  
8 Unfortunately, this result was not confirmed at the protein level (**Fig. 6E**),  
9 suggesting that SF3B1 may undergo post-transcriptional regulation. We found no  
10 other candidates for markers of sensitivity or resistance to E7107 based on  
11 available DNA or RNA sequencing data from this limited cohort of cell lines.

12 We further explored the hypothesis that interfering with splicing via two  
13 different mechanisms may lead to synergistic MM cell death. Indeed,  
14 combination studies with Cfz and E7107 showed strong synergy across the  
15 dosing landscape based on ZIP synergy scoring (40) (**Fig. 6F-G**). In contrast,  
16 melphalan, which induced much less IR than PI (**Fig. 3B-C**), showed much  
17 weaker synergy in combination with E7107 (**Fig. 6H-I**). These findings support  
18 the approach of using splicing inhibitors in combination with PIs in MM treatment.  
19 Also, this result strengthens the hypothesis that splicing interference is a part of  
20 the PI mechanism of action.

21

## 22 **E7107 is a highly potent versus myeloma both *in vivo* and *ex vivo***

23 Based on this encouraging *in vitro* data, we then moved into a standard *in*  
24 *vivo* MM model of luciferase-labeled MM.1S cells implanted intravenously into  
25 NOD *scid* gamma (NSG) immunocompromised mice. These cells home to the  
26 murine bone marrow, partially recapitulating the tumor microenvironment in  
27 human disease (41). We found that E7107 was generally well-tolerated with no  
28 appreciable weight loss (**Fig. S7A**). At 3 mg/kg E7107 I.V., a relatively low dose  
29 compared to prior studies in other malignancies (37), we still found pronounced  
30 anti-MM effect after a brief 2 week treatment (**Fig. 7A-C**). This suppression of

1 tumor translated into a significant survival benefit ( $p = 0.01$ , log-ranked test;  $n = 6$   
2 per arm).

3 We next turned to *ex vivo* evaluation versus primary patient samples.  
4 Fresh bone marrow mononuclear cells from seven PI-refractory MM patients  
5 were treated for 48 hr with varying doses of E7107. Based on flow cytometry  
6 analysis of CD138+ plasma cells (**Fig. S7B**), we found similar high sensitivity of  
7 patient tumor cells to E7107 as found in cell lines, with estimated LC<sub>50</sub>'s in the  
8 low-nM range (**Fig. 7D**). Notably, non-plasma cell bone marrow mononuclear  
9 cells (CD138- fraction) showed remarkably little cytotoxicity at these same doses,  
10 supporting a potential therapeutic index for splicing inhibitors in MM.

11

### 12 **Functional genomics and whole exome sequencing suggests clinical** 13 **applications of splicing inhibition in MM**

14 Analysis of CRISPR essentiality screen data in the Cancer Dependency  
15 Map ([www.depmap.org](http://www.depmap.org); Avana library public 18Q4 (42)), across over 400 cancer  
16 cell lines, demonstrated that myeloma has among the strongest genetic  
17 dependencies on the target of E7107, *SF3B1* (**Fig. S7C**). This genetic ablation  
18 data further supports the ability to pharmacologically eliminate MM tumor cells  
19 via splicing inhibition while sparing normal cells. We further extended this  
20 analysis to other core components of the U1-U2 spliceosome found to be  
21 “common essential” genes per DepMap (43). By aggregating DepMap rankings,  
22 we found that MM cell lines are the most sensitive tumor cell type to genetic  
23 ablation of these central snRNP protein components, necessary for association  
24 with pre-mRNA and splicing catalysis (**Fig. 7E**). Compared to the essential  
25 subunits of the 20S proteasome (including the direct PI target *PSMB5*) (**Fig.**  
26 **S7D**), we surprisingly found more favorable genetic evidence for targeting the  
27 spliceosome in MM than the proteasome.

28 Furthermore, a recent study validated the sulfonamide indisulam as an  
29 inhibitor of splicing via targeted degradation of RBM39, another component of the  
30 spliceosome with high homology to U2AF2 (44). In this work, hematopoietic  
31 malignancy cell lines were broadly more sensitive to indisulam than solid tumor

1 cell lines. We confirmed cytotoxicity of indisulam versus a panel of MM cell lines  
2 (**Fig. S7E**), though  $LC_{50}$ 's (0.3 - >20  $\mu$ M) were much higher than those for the  
3 SF3B1 inhibitor E7107. In DepMap data, MM was again among the more  
4 sensitive tumor type to RBM39 ablation (**Fig. S7F**). Indisulam may therefore  
5 represent another approach to targeting the spliceosome in this disease, though  
6 given lower potency the potential for clinical translation is less clear.

7 We next took advantage of genomic and transcriptomic data from isolated  
8 malignant plasma cells from newly-diagnosed MM patients in the Multiple  
9 Myeloma Research Foundation CoMMpass study ([research.themmr.org](http://research.themmr.org); version  
10 IA11). First evaluating gene expression data, we intriguingly found significantly  
11 decreased progression-free survival among patients in the top quartile of *SRSF1*  
12 expression versus those in the bottom quartile ( $p = 0.0081$  by log-ranked test)  
13 and a trend toward similarly decreased overall survival for patients in the top vs.  
14 bottom quartile of *SF3B1* expression ( $p = 0.087$ ) (**Fig. S7G**). These results raise  
15 the possibility of poorer outcomes in patients whose disease is more dependent  
16 on the spliceosome.

17 However, we note that both E7107 (37) and the recently described  
18 splicing inhibitor H3B-8800 (38) have both been shown to have the greatest  
19 potency versus hematopoietic malignancies carrying mutations in splicing factors  
20 such as *SF3B1*, *SRSF2*, *U2AF2*, and *ZRSR2* (45). These mutations are seen  
21 frequently in myelodysplastic syndromes (MDS), acute myeloid leukemia, and  
22 chronic lymphocytic leukemia, appearing in up to 50% of MDS patients (45). We  
23 therefore examined exome sequencing data available in CoMMpass and found  
24 that 28.0% of MM patients (268 of 956) were found to carry missense mutations  
25 within at least one of 119 splicing-associated factors recently proposed to be  
26 most relevant to tumorigenesis across a survey of the The Cancer Genome Atlas  
27 (**Fig. 7F, Supplementary Table S6**) (46). While only a small minority of these  
28 identified mutations has been functionally validated to affect splicing, the most  
29 common single mutation was at the known "hotspot" *SF3B1* K666T, found in  
30 three patients. Variant allele frequencies for these expected heterozygous  
31 mutations were 42%, 35%, and 22%, suggestive of a prominent subclonal

1 fraction of the tumor cell population. Among well-characterized genes, mutations  
2 were found in *SF3B1* ( $n = 10$  patients, including K666T mutations), *SRSF2* ( $n =$   
3  $2$ ), *U2AF1* ( $n = 4$ ), and *ZRSR2* ( $n = 1$ ). Unfortunately we were unable to obtain  
4 rare primary patient samples containing mutations in these genes, and no  
5 myeloma cell lines are known to carry hotspot mutations in these well-  
6 characterized splicing factors ([www.keatslab.org](http://www.keatslab.org)). While our data suggest that  
7 spliceosome inhibition should be considered a therapeutic option for MM patients  
8 of any genotype, recent work in other malignancies (37, 38) supports the  
9 potential for particular benefit in the subset of patients carrying pathogenic  
10 splicing factor mutations.

11

## 12 **DISCUSSION:**

13 Our results demonstrate that PI therapy in myeloma leads to both specific  
14 alterations in splice site usage and broad-scale interference with spliceosome  
15 function. This observation, initially generated through unbiased  
16 phosphoproteomics, led us to explore the spliceosome itself as a MM  
17 vulnerability. Our preclinical evaluation and analysis of functional genomics and  
18 exome sequencing data further reinforced the spliceosome as a therapeutic  
19 target in MM.

20 These results raise a number of intriguing questions. From a mechanistic  
21 perspective, prior work examining SR phosphorylation after cellular perturbation  
22 using Western blotting did not consistently show a broad hyperphosphorylation  
23 signature (47-49). Our results therefore illustrate the utility of unbiased  
24 phosphoproteomics to elucidate cancer drug response. Recent work suggests  
25 that additional kinases beyond the well-characterized SRPKs and CLKs may be  
26 involved in SR phosphorylation (50, 51). However, in the context of drug-induced  
27 stress in cancer, the mechanism that leads to coordinated, upregulated  
28 phosphorylation across multiple splicing factors, whether via kinase activation or  
29 phosphatase inhibition, will be an important topic for future investigation.

30 We also found a correlation between PI-induced stress and both SR factor  
31 phosphorylation and the degree of alternative exon selection. This finding

1 appears consistent with prior studies (16) suggesting that SR factors play a role  
2 in exon selection and their activity can be modulated by phosphorylation. Why  
3 these effects specifically lead to alternative splicing of protein homeostasis genes  
4 remains to be investigated. In contrast, we found IR to be largely independent of  
5 the degree of PI-induced stress. This result suggests that the IR phenotype is  
6 mediated by a different mechanism and uncoupled from SR factor  
7 phosphorylation.

8         In attempting to model the relationship between SR phosphorylation and  
9 splicing, we recognize our phosphomimetic construct likely does not fully  
10 recapitulate the complex phosphorylation biology of SRSF1 within cells (27), nor  
11 does it fully match the level of expression of endogenous SRSF1. In general,  
12 causal links have been noted between SRSF1 phosphorylation and splicing in  
13 single transcript, *in vitro* systems (34, 52, 53), but isolating global effects of SR  
14 phosphorylation on splicing within cells have remained elusive. Furthermore,  
15 using genetic approaches we cannot readily model phosphorylation changes on  
16 multiple SR proteins simultaneously, which may be necessary to elicit broader  
17 phenotypic effects. Despite these limitations, however, our WT expression  
18 studies provide a landscape of the SRSF1 cytosolic and nuclear interactome,  
19 which may inform future studies of SR protein biology in myeloma and other  
20 systems.

21         This PI-induced interference with normal splicing even at minimal  
22 cytotoxicity, much greater than that found with melphalan, may relate to the  
23 activation of the heat shock response. We found prominent heat shock  
24 chaperone induction even under a non-cytotoxic dose of the PI bortezomib in  
25 MM.1S cells (10). As previously shown in non-cancer cells, heat shock alone,  
26 without cell death, can lead to significant intron retention (23). One hypothesis is  
27 that this broad-scale inhibition of splicing acts in a similar fashion to translational  
28 inhibition after drug-induced stress: a way to conserve cellular resources and  
29 focus on only producing genes required for survival and the stress response.  
30 However, as described in our model of **Fig. 5E**, and evidenced by our mRNA-seq  
31 data after E7107 treatment (**Fig. 6A**), another possible result of widespread

1 intron retention and downstream loss of normal protein production is significant  
2 decrease in cellular fitness and ultimately, cell death. There may be a  
3 quantitative threshold effect between these two outcomes that remains to be  
4 elucidated.

5 Here, we propose that the loss-of-fitness modality of drug-induced IR  
6 constitutes a previously unexplored mechanism of action of PIs. We further  
7 performed a preclinical evaluation of splicing inhibition in myeloma using E7107,  
8 finding potent anti-myeloma effects *in vitro*, *in vivo*, and *ex vivo* versus primary  
9 patient samples. From a therapeutic perspective, one of the major questions is  
10 the potential toxicity of targeting such an essential process as the catalytic  
11 spliceosome. However, our analysis of genetic dependency data and our *ex vivo*  
12 data with E7107 clearly demonstrates the potential to target core spliceosome  
13 subunits in MM while largely sparing normal cells. In fact, based on this analysis  
14 the spliceosome appears to be an even more promising target than the clinically-  
15 validated approach of targeting essential subunits of the proteasome.  
16 Furthermore, presumed efficacious doses (based on measured blood  
17 concentrations in the nM range) of E7107 were largely well tolerated in a Phase I  
18 clinical trial (54). While this molecule is no longer in clinical development, it is  
19 thought that E7107 visual toxicity was molecule-specific and is not a function of  
20 targeting the spliceosome in general (15). Our genomic analysis suggests that  
21 mutations in splicing factors are found in a substantial fraction of MM patients.  
22 Newer generations of splicing inhibitors are currently in clinical trials for other  
23 hematologic malignancies (38) (NCT02841540) and may be of particular benefit  
24 for these patients. Our results support clinical investigation of these compounds  
25 in MM either alone or to enhance PI efficacy as combination therapy.

26

## 27 **METHODS**

### 28 **Cell culture**

29 All cell lines were grown in suspension at 37°C, 5% CO<sub>2</sub> in complete media:  
30 RPMI 1640 medium (Gibco, 22400105, UCSF CCFAE002), supplemented with  
31 10% FBS (Atlanta Biologicals, S11150) for proteomics experiments and

1 Benchmark FBS (Gemini Bio-products, 100-106) for drug viability experiments  
2 and 1% penicillin-streptomycin (UCSF, CCFGK003). INA6 cell media was  
3 supplemented with 90 ng/mL recombinant human IL-6 (ProSpec Bio, CYT-213).

#### 4 5 **Drug cytotoxicity assay**

6 For dose-response cell toxicity assays, 1E+3 myeloma cells were seeded per  
7 well in 384 well plates (Corning) using the Multidrop Combi (Thermo Fisher) and  
8 incubated for 24 hr. In monotherapy cytotoxicity assays, cells were treated with  
9 drug or DMSO and incubated for 48 hr, while cells were further incubated with  
10 E7107 (H3) for an additional 24 hr in E7107 dual therapy combination assays.  
11 Carfilzomib (SelleckChem, S2853-50mg), melphalan (Sigma, S2853-50mg), and  
12 E7107 (H3 Biomedicine, CAS:630100-90-2), and KH-CB19 (sc-362756) were  
13 solubilized in DMSO at 10 mM.

14  
15 All cell viability was determined with Cell-Titer Glo reagent (Promega, G7573)  
16 using a Glomax Explorer (Promega) luminescence plate reader. For the drug  
17 titration cytotoxicity assays, measurements were performed in quadruplicate,  
18 while measurements were performed in triplicate in all other assays, and  
19 viabilities are reported as mean (+/- S.D.) ratio normalized to DMSO-treated  
20 controls or measurements at 0 hr. For ZIP synergy calculations, normalized  
21 viability data was submitted to SynergyFinder web application (40).

#### 22 23 **Drug dosing for proteomics and RNA-seq experiments**

24 Proteomic/phosphoproteomic/RNA-seq experiments were performed at a cell  
25 density of 1E6 cells/mL. For timecourse studies, ~20E6 cells were grown in  
26 complete media for each timepoint (0, 8, 16, and 24 hr), whereas for single-  
27 timepoint experiments, 15-20E+6 cells in light SILAC media were treated with  
28 drug compound and cells in heavy SILAC media (L-Lysine-<sup>13</sup>C<sub>6</sub>, <sup>15</sup>N<sub>2</sub>, L-Arginine-  
29 <sup>13</sup>C<sub>6</sub>, <sup>15</sup>N<sub>4</sub> (Cambridge Isotope, CNLM-291-H-1, CNLM-539-H-1) were treated with  
30 DMSO for 24 hr. 1-3E+6 cells were set aside for RNA-seq. Cells were washed in  
31 PBS and cell pellets were frozen in liquid nitrogen (LN2) and stored in -80°C. 1

1 biological replicate for the timecourse experiment, 2 biological replicates for each  
2 single-timepoint condition (with a third only for RNA-seq), and 3 biological  
3 replicates for all AP-MS were gathered and analyzed.

4

#### 5 **Cloning and lentiviral transduction**

6 SRSF1 and mCherry genes, along with 3X FLAG sequences and nuclear  
7 localization signal (NLS) were cloned into pLV-416G second generation lentiviral  
8 plasmid (UCSF HMTB) by Gibson Assembly. SRSF1 constructs were transfected  
9 into Lenti-X 293T (Takara Bioscience, 632180) packaging cells with Gag-Pol  
10 expressing pCMV-dR8.91 (Addgene, Plasmid#2221) and VSV-G envelope  
11 expressing pMD2.G (Addgene, Plasmid#12259) plasmids. Viral particles were  
12 harvested, concentrated with Lenti-X concentrator (Takara Bioscience, 631231)  
13 and viral titers were incubated with AMO-1 cells. Positively transduced cells were  
14 selected with selection drug, G418 (VWR, 970-3-058), for several passages, then  
15 by mCherry expression with Fluorescence Activated Cell Sorting (FACS, Sony  
16 SH800). Protocol details are found in Supplementary Information.

17

#### 18 **Phosphoproteomic peptide preparation**

19 Frozen pellets of ~15-20E6 cells were lysed in 8 M urea, 0.1 M Tris pH 8.0, 150  
20 mM NaCl and 1X HALT phosphatase/protease inhibitor cocktail (Pierce, 78442)  
21 for timecourse experiments or 8 M Guanadine-Cl (Gdn, Chem Impex Intl., 00152-  
22 1KG), 0.1 M Tris pH 8.5, 10 mM tris(2-carboxyethyl)phosphine (TCEP, Pierce,  
23 20491), 40 mM 2-chloroacetamide (2-CAA, Sigma, 22790-250G-F), 1X HALT for  
24 SILAC samples and lysed with probe sonicator (BRANSONIC). In the case of  
25 single-timepoint SILAC samples, equal part light and heavy labeled lysate  
26 samples were combined (~ 2.5–3 mg total). Lysate is diluted with 0.1 M Tris pH  
27 8.0 to a final concentration of 1.3 M Gdn or urea. Proteome is digested with  
28 1:100 dilution of trypsin overnight for 22-24 hr at room temperature. Peptides are  
29 extracted with SEP-PAK C18 cartridges (WATERS). For single-timepoint SILAC  
30 samples, ~100 µg of eluted peptides were dried and analyzed separately by LC-  
31 MS/MS as unenriched “global proteomics.” Remainder of eluate was diluted 3-4



1 fold with water, lyophilized, then resuspended in 80% ACN, 0.1% TFA and  
2 enriched on FeCl<sub>3</sub> charged NTA-agarose beads sitting atop a C18 matrix in a  
3 stage-tip platform (Nest). Eluted phosphopeptides are dried and stored at -80°C.

4

## 5 **Affinity Purification**

6 For each replicate, frozen cell pellets were gently lysed on ice with 200 µl  
7 hypotonic lysis buffer (20 mM Tris (pH 7.4@4°C), 10 mM KCl, 0.1 mM EDTA  
8 (Fisher, BP120-500), 0.5% NP-40 alternative (EMD, 492016-100ML), 1 mM DTT  
9 (Gold Biotech, DTT50), 1 mM PMSF (RPI, P20270-1.0), 1x HALT  
10 protease/phosphatase inhibitor cocktail (Pierce, 78442), 300mM Sucrose, 0.03  
11 U/mL aprotinin (RPI, A20550-0.001)), underwent 3 X freeze-thaw cycles, and  
12 clarified with 5 passes through an 18-gauge syringe needle. Lysate was  
13 centrifuged at 5,000 rcf, 4°C for 10 min and supernatant was reserved as  
14 cytoplasmic fraction, while nuclear fraction was washed and resuspended in 60  
15 µl of 20 mM HEPES (pH 7.9), 420 mM NaCl, 25% glycerol, 1 mM EDTA, 1 mM  
16 DTT, 1 mM PMSF, 0.03 U/mL aprotinin, 1x protease/phosphatase inhibitor  
17 cocktail (HALT), 25 U Benzonase/mL and clarified with 10 passes through 18-  
18 gauge syringe needle. Both fractions were adjusted to 50 mM Tris pH 7.4, 150  
19 mM NaCl, 1mM EDTA (binding buffer) and combined with M2 anti-FLAG  
20 magnetic beads (Sigma, M8823). Bound lysate was washed with binding buffer +  
21 0.05% NP-40, then binding buffer, then twice with 20 mM Tris pH 8.0, 2 mM  
22 CaCl<sub>2</sub>. Proteins are denatured and cystines are reduced and alkylated with 6 M  
23 Gdn, 40 mM 2-CAA, 5 mM TCEP, 100 mM Tris pH 8.0, then trypsinized on-bead  
24 with ~0.75 µg trypsin/ sample, ~ 20h at 37°C, and peptides were desalted with  
25 homemade C18 stagetips and dried and stored at -80°C.

26

## 27 **LC-MS/MS**

28 ~1 µg peptides were analyzed for each sample by “shotgun-“ LC-MS/MS on a  
29 Dionex Ultimate 3000 RSLCnano with 15 cm Acclaim PEPMAP C18 (Thermo,  
30 164534) reverse phase column and Thermo Q-Exactive plus mass spectrometer.  
31 Samples were analyzed with either a 3h 15 min non-linear gradient or a 1h 23

1 min linear gradient from 2.4% acetonitrile (ACN, Sigma, 34998-4L), 0.1% FA to  
2 32% ACN. Experiment specific LC-MS/MS settings are listed in Supplementary  
3 Information.

4

### 5 **Proteomic data analysis and quantification**

6 Initial timecourse unlabeled phosphoproteomics data were processed together  
7 on Maxquant v1.5.1.2 (55) and searched against the human proteome (Uniprot  
8 downloaded 2014/12/3, with 89,706 entries). All AP-MS samples were processed  
9 together with similar settings. All SILAC samples (phospho- and unenriched  
10 peptides) were processed together with similar settings. SILAC quantification for  
11 global proteomics at the protein level requires 1 minimum razor or unique  
12 peptide. A one-sample T-test was applied to the log-2 transform of the  
13 normalized SILAC-labeled peptide ratios (heavy:light) for single-timepoint  
14 analysis, while for AP-MS data, two-sample T-test was applied to the log-2  
15 transform of the median-normalized MaxQuant label-free quantification (LFQ)  
16 values of protein groups. The number of total entries (phosphosites, protein  
17 groups, significance is  $p < 0.05$ ,  $|t\text{-test difference}| \geq 1$ ), along with correlation  
18 statistics between replicates, are summarized in **Supplementary Table S4** and  
19 shown in **Fig. S3B**. See Supplementary Information for specific search and  
20 analysis settings.

21

### 22 **RNA-seq library preparation**

23 RNA was extracted from frozen cell pellets with RNeasy Mini-prep kit (Qiagen,  
24 74104). For timecourse experiments, cDNA library of expression transcripts was  
25 carried out with RNA Hyper Prep kit with RiboErase (Kapa, KK8560) to enhance  
26 transcript reads above ribosomal reads, while single-timepoint experiments  
27 assessing splicing required mRNA enrichment with magnetic mRNA Isolation kit  
28 poly-dT beads (NEB), then RNA Hyper Prep kit (Kapa, KK8540) for cDNA  
29 construction of 200-400 bp library with Illumina platform TruSeq indexed  
30 adaptors (**Supplementary Table S1**). RNA and DNA quantified at all steps by  
31 Nanodrop (Thermo Scientific) and cDNA library size and quality were evaluated

1 on a Bioanalyzer 2100 (Agilent) with High Sensitivity DNA Kit (Agilent, 5067-  
2 4626), before being submitted for next generation sequencing on a HiSeq4000  
3 (Illumina) at the UCSF Center for Advanced Technologies core facility.

4

#### 5 **JuncBASE alternative splicing analysis**

6 Alternative splicing events were identified and quantified with JuncBASE v1.2-  
7 beta using default parameters (21). Intron-exon junction database was created  
8 from hg19 annotations. T-test was used to compare number of inclusion and  
9 exclusion reads and p-values were adjusted with Benjamini-Hochberg correction.  
10 For  $\Delta$ PSI histograms in Fig. **3B-C, 4C-D, and 5A**, JuncBASE output included a  
11 subset of alternative splice events with median PSI = 0.00 in both conditions or  
12 median PSI = 100.00 in both conditions, resulting in  $\Delta$ PSI = 0.00. These events  
13 were manually removed for downstream analyses. Histograms and splicing  
14 statistics were determined with statistical computing program R (v3.5.1) and a  
15 summary is listed in **Supplementary Table S3**.

16

#### 17 **Gene Ontology enrichment analysis**

18 Gene Ontology (GO) enrichment analysis of upregulated phosphosites and  
19 enriched SRSF1 interactors was performed in STRING (v10.5, [https://string-  
20 db.org/](https://string-db.org/)) (56), searching against a background of all quantified protein entries.  
21 Enrichment analysis of all significantly alternative spliced genes (raw  $p < 0.05$ )  
22 was performed using web-based enrichment analysis tool, Enrichr  
23 (<http://amp.pharm.mssm.edu/Enrichr/>) (57). Reported combined score is  
24 calculated by multiplying the natural log transform of the  $p$ -value with the Fisher's  
25 exact test of expected rank deviation (Z-score). Functional GO analysis is limited  
26 to biological processes and compiled in **Supplementary Table S5**.

27

#### 28 **Xenograft mouse model and *in vivo* luminescence imaging**

29 1E6 MM.1S-luc cells, stably expressing luciferase, were transplanted via tail vein  
30 injection into 12 NOD.Cg-Prkdc<sup>scid</sup> Il2rg<sup>tm1Wjl</sup>/SzJ (NSG) mice from The Jackson  
31 Laboratory (cat# 005557). All the mice were female, 6-8 wks old at start of

1 studies, and typically weigh 20-25 g. NSG mice were handled with aseptic  
2 techniques and housed in pathogen free environments at the UCSF Laboratory  
3 Animal Research Center. All mouse studies were performed according to UCSF  
4 Institutional Animal Care and Use Committee-approved protocols. Tumor burden  
5 was assessed through weekly bioluminescent imaging in the UCSF preclinical  
6 therapeutic core on a Xenogen In Vivo Imaging System (IVIS), beginning 13 days  
7 after implantation, which is the same day as treatment initiation. Tumor implanted  
8 humanized mice were randomized and sorted into control arm and treatment  
9 arm, 6 mice/arm. Mice were treated for two weeks (five days on, two days off)  
10 with vehicle or 3 mg/kg E7107, formulated in vehicle (10% Ethanol, 5% Tween-  
11 80, QS with Saline) and administered by continuous subcutaneous infusion. Mice  
12 were kept and observed until survival endpoint; final timepoint was 54 days after  
13 MM.1S transplant. Acquired luciferase intensities were quantified with Living  
14 Image Software (PerkinElmer) in units of radiance (photons/s/cm<sup>2</sup>/sr). Kaplan-  
15 meier survival curves along with log-ranked test to determine significance were  
16 calculated in GraphPad Prism 6 software.

17

### 18 **Patient bone marrow aspirate, CD138 labeling and flow cytometry analysis**

19 Fresh de-identified primary multiple myeloma patient bone marrow (BM) samples  
20 were obtained from the UCSF Hematologic Malignancies Tissue Bank in  
21 accordance with the UCSF Committee on Human Research-approved protocols  
22 and the Declaration of Helsinki. Bone marrow mononuclear cells were isolated by  
23 density gradient centrifugation with Histopaque-1077 (Sigma Aldrich), and  
24 washed with 10 mL D-PBS 3 times. Mononuclear cells were resuspended in a  
25 small volume (~1.5 mL) of media (RPMI1640, 10% FBS, 1%  
26 penicillin/streptomycin, 2 mM glutamine) and incubated at 37°C, 5% CO<sub>2</sub> for  
27 15min. Isolated mononuclear cells from multiple myeloma patient bone marrow  
28 were adjusted to 2E5 cells/well in a 96 well plate. Cells were stimulated with 50  
29 ng/ml recombinant human IL-6 (ProsPec) for 17 hr before treatment with E7107  
30 or DMSO for 24 hr. Cells were then stained with 10 µL Alexa-Fluor 647 mouse  
31 anti-human CD138 antibody (BD Pharmingen, cat# 562097;

1 RRID:AB\_10895974) or Alexa-Fluor 647 IgG  $\kappa$  isotype (BD Pharmingen, cat#  
2 557714; RRID:AB\_396823) control and 2  $\mu$ L SyTOX Green (Thermo, S34860)  
3 per 1 mL FACS buffer (D-PBS, 5% FBS). Resuspended cells are characterized  
4 with a CytoFLEX fluorescence cytometer (BD).

5

## 6 **Statistical Analyses**

7 All data are presented as mean +/- standard deviation, unless otherwise stated.  
8 Statistical significance in proteomics comparisons was determined by Student's *t*-  
9 test: One-sample *t*-test with null hypothesis that  $\log_2$ -transform of the normalized  
10 SILAC ratio = 0, or a two-sample *T*-test with null hypothesis that the difference in  
11  $\log_2$ -transform of the intensities is equal to. A  $p < 0.05$  is considered statistically  
12 significant. For all Kaplan-Meier survival analysis, log-ranked test was used to  
13 determine statistical significance.

14

## 15 **Data Availability**

16 The mass spectrometry proteomics data and MaxQuant analysis results have  
17 been deposited to the ProteomeXchange Consortium via the PRIDE (58) partner  
18 repository with the dataset identifier PXD012172. Datasets are private during  
19 review; reviewers may access datasets with following credentials:

20 Username: reviewer92428@ebi.ac.uk

21 Password: Xxe5zQtD

22

23 Raw RNA-seq data, processed analysis files, and JuncBASE results may be  
24 downloaded from the Gene Expression Omnibus, GEO  
25 (<https://www.ncbi.nlm.nih.gov/geo/>) with the accession number: GSE124510.

26 Reviewers may access this data during review with the token: ifwxqgsgptcbtgz

27

## 28 **Acknowledgements**

29 We thank Dr. Silvia Buonamici at H3 Biomedicine for providing E7107 and  
30 insightful discussions and Jacob Runyan for assisting in quality control of  
31 sequencing data. We thank Drs. Renate Burger and Christoph Driessen for

1 providing INA-6 and AMO-1 parental and bortezomib resistant cell lines,  
2 respectively. We also thank the lab of James Wells for use of Zeiss Z1 Observer  
3 microscope, Center for Advanced Technology at UCSF for HiSeq sequencing,  
4 Dr. Jane Gordon and the Laboratory for Cell Analysis at Helen Diller Family  
5 Comprehensive Cancer Center for use and assistance of Sony SH800, and Dr.  
6 Danielle Swaney for discussion of AP-MS. This work was supported by NIH/NCI  
7 P30CA083103 (Cancer Center Support Grant, supporting UCSF Preclinical  
8 Therapeutic Core facility managed by B.C.H.), NIH/NHGRI T32HG008345 (to  
9 A.M.T.), the Damon Runyon Cancer Research Foundation Dale Frey  
10 Breakthrough Award (DFS 14-15), NIH/NCI K08CA184116, NIH/NIGMS  
11 DP2OD022552, and the UCSF Stephen and Nancy Grand Multiple Myeloma  
12 Translational Initiative (to A.P.W.) and NIH/NCI R01CA226851 (to A.N.B. and  
13 A.P.W.).

14

#### 15 **Author Contributions**

16 H.H.H., I.F., C.L., P.B., M.C.M., M.M., and A.P.W. performed experiments and  
17 analyzed experimental data. A.M.T., Y-H.L., and A.B. analyzed transcriptomic  
18 and genomic data. J.M., P.P., and B.C.H. performed *in vivo* studies. T.G.M.,  
19 J.L.W., S.W.W., and N.S. consented patients and obtained primary specimens.  
20 H.H.H. and A.P.W. wrote the manuscript with input from all authors.

21

#### 22 **Declaration of Interests**

23 The authors declare no relevant conflicts of interest.

24

#### 25 **REFERENCES**

- 26 1. Walter P and Ron D. The unfolded protein response: from stress pathway  
27 to homeostatic regulation. *Science* 2011;334(6059):1081-6 doi  
28 10.1126/science.1209038.
- 29 2. Obeng EA, Carlson LM, Gutman DM, Harrington WJ, Jr., Lee KP and  
30 Boise LH. Proteasome inhibitors induce a terminal unfolded protein response in

- 1 multiple myeloma cells. *Blood* 2006;107(12):4907-16 doi 10.1182/blood-2005-08-  
2 3531.
- 3 3. Lee AH, Iwakoshi NN, Anderson KC and Glimcher LH. Proteasome  
4 inhibitors disrupt the unfolded protein response in myeloma cells. *Proc Natl Acad*  
5 *Sci USA* 2003;100(17):9946-51 doi 10.1073/pnas.1334037100.
- 6 4. Le Moigne R, Aftab BT, Djakovic S, Dhimolea E, Valle E, Murnane M, *et*  
7 *al.* The p97 inhibitor CB-5083 is a unique disrupter of protein homeostasis in  
8 models of Multiple Myeloma. *Mol Cancer Therap* 2017 doi 10.1158/1535-  
9 7163.MCT-17-0233.
- 10 5. Gandolfi S, Laubach JP, Hideshima T, Chauhan D, Anderson KC and  
11 Richardson PG. The proteasome and proteasome inhibitors in multiple myeloma.  
12 *Cancer Metas Rev* 2017;36(4):561-84 doi 10.1007/s10555-017-9707-8.
- 13 6. Suraweera A, Munch C, Hanssum A and Bertolotti A. Failure of amino  
14 acid homeostasis causes cell death following proteasome inhibition. *Mol Cell*  
15 2012;48(2):242-53 doi 10.1016/j.molcel.2012.08.003.
- 16 7. Wallington-Beddoe CT, Sobieraj-Teague M, Kuss BJ and Pitson SM.  
17 Resistance to proteasome inhibitors and other targeted therapies in myeloma. *Br*  
18 *J Haematol* 2018;182(1):11-28 doi 10.1111/bjh.15210.
- 19 8. Mitra AK, Harding T, Mukherjee UK, Jang JS, Li Y, HongZheng R, *et al.* A  
20 gene expression signature distinguishes innate response and resistance to  
21 proteasome inhibitors in multiple myeloma. *Blood Cancer J* 2017;7(6):e581 doi  
22 10.1038/bcj.2017.56.
- 23 9. Wiita AP, Ziv E, Wiita PJ, Urisman A, Julien O, Burlingame AL, *et al.*  
24 Global cellular response to chemotherapy-induced apoptosis. *eLife*  
25 2013;2:e01236 doi 10.7554/eLife.01236.
- 26 10. Liu TY, Huang HH, Wheeler D, Xu Y, Wells JA, Song YS, *et al.* Time-  
27 Resolved Proteomics Extends Ribosome Profiling-Based Measurements of  
28 Protein Synthesis Dynamics. *Cell Syst* 2017;4(6):636-44 e9 doi  
29 10.1016/j.cels.2017.05.001.

- 1 11. Mitsiades N, Mitsiades CS, Poulaki V, Chauhan D, Fanourakis G, Gu X, *et*  
2 *al.* Molecular sequelae of proteasome inhibition in human multiple myeloma cells.  
3 *Proc Natl Acad Sci USA* 2002;99(22):14374-9 doi 10.1073/pnas.202445099.
- 4 12. Shah SP, Lonial S and Boise LH. When Cancer Fights Back: Multiple  
5 Myeloma, Proteasome Inhibition, and the Heat-Shock Response. *Mol Cancer*  
6 *Res* 2015;13(8):1163-73 doi 10.1158/1541-7786.MCR-15-0135.
- 7 13. Li X, Colvin T, Rauch JN, Acosta-Alvear D, Kampmann M, Dunyak B, *et*  
8 *al.* Validation of the Hsp70-Bag3 protein-protein interaction as a potential  
9 therapeutic target in cancer. *Mol Cancer Therap* 2015;14(3):642-8 doi  
10 10.1158/1535-7163.MCT-14-0650.
- 11 14. Casado P, Hijazi M, Britton D and Cutillas PR. Impact of  
12 phosphoproteomics in the translation of kinase-targeted therapies. *Proteomics*  
13 2017;17(6) doi 10.1002/pmic.201600235.
- 14 15. Lee SC and Abdel-Wahab O. Therapeutic targeting of splicing in cancer.  
15 *Nat Med* 2016;22(9):976-86 doi 10.1038/nm.4165.
- 16 16. Long JC and Caceres JF. The SR protein family of splicing factors: master  
17 regulators of gene expression. *Biochem J* 2009;417(1):15-27 doi  
18 10.1042/BJ20081501.
- 19 17. Casado P, Rodriguez-Prados JC, Cosulich SC, Guichard S,  
20 Vanhaesebroeck B, Joel S, *et al.* Kinase-substrate enrichment analysis provides  
21 insights into the heterogeneity of signaling pathway activation in leukemia cells.  
22 *Sci Signaling* 2013;6(268):rs6 doi 10.1126/scisignal.2003573.
- 23 18. Colwill K, Pawson T, Andrews B, Prasad J, Manley JL, Bell JC, *et al.* The  
24 Clk/Sty protein kinase phosphorylates SR splicing factors and regulates their  
25 intranuclear distribution. *EMBO J* 1996;15(2):265-75.
- 26 19. Traenckner EB, Wilk S and Baeuerle PA. A proteasome inhibitor prevents  
27 activation of NF-kappa B and stabilizes a newly phosphorylated form of I kappa  
28 B-alpha that is still bound to NF-kappa B. *EMBO J* 1994;13(22):5433-41.
- 29 20. Fedorov O, Huber K, Eisenreich A, Filippakopoulos P, King O, Bullock AN,  
30 *et al.* Specific CLK inhibitors from a novel chemotype for regulation of alternative  
31 splicing. *Chem Biol* 2011;18(1):67-76 doi 10.1016/j.chembiol.2010.11.009.



- 1 21. Brooks AN, Yang L, Duff MO, Hansen KD, Park JW, Dudoit S, *et al.*  
2 Conservation of an RNA regulatory map between *Drosophila* and mammals.  
3 *Genome Res* 2011;21(2):193-202 doi 10.1101/gr.108662.110.
- 4 22. Yost HJ and Lindquist S. RNA splicing is interrupted by heat shock and is  
5 rescued by heat shock protein synthesis. *Cell* 1986;45(2):185-93.
- 6 23. Shalgi R, Hurt JA, Lindquist S and Burge CB. Widespread inhibition of  
7 posttranscriptional splicing shapes the cellular transcriptome following heat  
8 shock. *Cell Rep* 2014;7(5):1362-70 doi 10.1016/j.celrep.2014.04.044.
- 9 24. Marchesini M, Ogoti Y, Fiorini E, Aktas Samur A, Nezi L, D'Anca M, *et al.*  
10 ILF2 Is a Regulator of RNA Splicing and DNA Damage Response in 1q21-  
11 Amplified Multiple Myeloma. *Cancer Cell* 2017;32(1):88-100 e6 doi  
12 10.1016/j.ccell.2017.05.011.
- 13 25. Karni R, de Stanchina E, Lowe SW, Sinha R, Mu D and Krainer AR. The  
14 gene encoding the splicing factor SF2/ASF is a proto-oncogene. *Nat Struct Mol*  
15 *Biol* 2007;14(3):185-93 doi 10.1038/nsmb1209.
- 16 26. Misteli T, Caceres JF, Clement JQ, Krainer AR, Wilkinson MF and Spector  
17 DL. Serine phosphorylation of SR proteins is required for their recruitment to  
18 sites of transcription in vivo. *J Cell Biol* 1998;143(2):297-307.
- 19 27. Ghosh G and Adams JA. Phosphorylation mechanism and structure of  
20 serine-arginine protein kinases. *FEBS J* 2011;278(4):587-97 doi 10.1111/j.1742-  
21 4658.2010.07992.x.
- 22 28. Caceres JF, Sreaton GR and Krainer AR. A specific subset of SR  
23 proteins shuttles continuously between the nucleus and the cytoplasm. *Genes*  
24 *Dev* 1998;12(1):55-66.
- 25 29. Misteli T, Caceres JF and Spector DL. The dynamics of a pre-mRNA  
26 splicing factor in living cells. *Nature* 1997;387(6632):523-7 doi  
27 10.1038/387523a0.
- 28 30. Caceres JF, Misteli T, Sreaton GR, Spector DL and Krainer AR. Role of  
29 the modular domains of SR proteins in subnuclear localization and alternative  
30 splicing specificity. *J Cell Biol* 1997;138(2):225-38.

- 1 31. Aubol BE, Serrano P, Fattet L, Wuthrich K and Adams JA. Molecular  
2 interactions connecting the function of the serine-arginine-rich protein SRSF1 to  
3 protein phosphatase 1. *J Biol Chem* 2018;293(43):16751-60 doi  
4 10.1074/jbc.RA118.004587.
- 5 32. Das R, Yu J, Zhang Z, Gygi MP, Krainer AR, Gygi SP, *et al.* SR proteins  
6 function in coupling RNAP II transcription to pre-mRNA splicing. *Mol Cell*  
7 2007;26(6):867-81 doi 10.1016/j.molcel.2007.05.036.
- 8 33. Huang Y, Gattoni R, Stevenin J and Steitz JA. SR splicing factors serve as  
9 adapter proteins for TAP-dependent mRNA export. *Mol Cell* 2003;11(3):837-43.
- 10 34. Xiao SH and Manley JL. Phosphorylation of the ASF/SF2 RS domain  
11 affects both protein-protein and protein-RNA interactions and is necessary for  
12 splicing. *Genes Dev* 1997;11(3):334-44.
- 13 35. Cho S, Hoang A, Sinha R, Zhong XY, Fu XD, Krainer AR, *et al.* Interaction  
14 between the RNA binding domains of Ser-Arg splicing factor 1 and U1-70K  
15 snRNP protein determines early spliceosome assembly. *Proc Natl Acad Sci USA*  
16 2011;108(20):8233-8 doi 10.1073/pnas.1017700108.
- 17 36. Ngo JC, Chakrabarti S, Ding JH, Velazquez-Dones A, Nolen B, Aubol BE,  
18 *et al.* Interplay between SRPK and Clk/Sty kinases in phosphorylation of the  
19 splicing factor ASF/SF2 is regulated by a docking motif in ASF/SF2. *Molecular*  
20 *Cell* 2005;20(1):77-89 doi 10.1016/j.molcel.2005.08.025.
- 21 37. Lee SC, Dvinge H, Kim E, Cho H, Micol JB, Chung YR, *et al.* Modulation  
22 of splicing catalysis for therapeutic targeting of leukemia with mutations in genes  
23 encoding spliceosomal proteins. *Nat Med* 2016;22(6):672-8 doi  
24 10.1038/nm.4097.
- 25 38. Seiler M, Yoshimi A, Darman R, Chan B, Keaney G, Thomas M, *et al.*  
26 H3B-8800, an orally available small-molecule splicing modulator, induces  
27 lethality in spliceosome-mutant cancers. *Nat Med* 2018;24(4):497-504 doi  
28 10.1038/nm.4493.
- 29 39. Soriano GP, Besse L, Li N, Kraus M, Besse A, Meeuwenoord N, *et al.*  
30 Proteasome inhibitor-adapted myeloma cells are largely independent from

- 1 proteasome activity and show complex proteomic changes, in particular in redox  
2 and energy metabolism. *Leukemia* 2016 doi 10.1038/leu.2016.102.
- 3 40. Yadav B, Wennerberg K, Aittokallio T and Tang J. Searching for Drug  
4 Synergy in Complex Dose-Response Landscapes Using an Interaction Potency  
5 Model. *Comp Struct Biotechnol J* 2015;13:504-13 doi  
6 10.1016/j.csbj.2015.09.001.
- 7 41. McMillin DW, Negri JM and Mitsiades CS. The role of tumour-stromal  
8 interactions in modifying drug response: challenges and opportunities. *Nat Rev*  
9 *Drug Discov* 2013;12(3):217-28 doi 10.1038/nrd3870.
- 10 42. Tsherniak A, Vazquez F, Montgomery PG, Weir BA, Kryukov G, Cowley  
11 GS, *et al.* Defining a Cancer Dependency Map. *Cell* 2017;170(3):564-76 e16 doi  
12 10.1016/j.cell.2017.06.010.
- 13 43. Wahl MC, Will CL and Luhrmann R. The spliceosome: design principles of  
14 a dynamic RNP machine. *Cell* 2009;136(4):701-18 doi  
15 10.1016/j.cell.2009.02.009.
- 16 44. Han T, Goralski M, Gaskill N, Capota E, Kim J, Ting TC, *et al.* Anticancer  
17 sulfonamides target splicing by inducing RBM39 degradation via recruitment to  
18 DCAF15. *Science* 2017;356(6336) doi 10.1126/science.aal3755.
- 19 45. Saez B, Walter MJ and Graubert TA. Splicing factor gene mutations in  
20 hematologic malignancies. *Blood* 2017;129(10):1260-9 doi 10.1182/blood-2016-  
21 10-692400.
- 22 46. Seiler M, Peng S, Agrawal AA, Palacino J, Teng T, Zhu P, *et al.* Somatic  
23 Mutational Landscape of Splicing Factor Genes and Their Functional  
24 Consequences across 33 Cancer Types. *Cell Rep* 2018;23(1):282-96 e4 doi  
25 10.1016/j.celrep.2018.01.088.
- 26 47. Shin C, Feng Y and Manley JL. Dephosphorylated SRp38 acts as a  
27 splicing repressor in response to heat shock. *Nature* 2004;427(6974):553-8 doi  
28 10.1038/nature02288.
- 29 48. Jakubauskiene E, Vilys L, Makino Y, Poellinger L and Kanopka A.  
30 Increased Serine-Arginine (SR) Protein Phosphorylation Changes Pre-mRNA

- 1 Splicing in Hypoxia. *J Biol Chem* 2015;290(29):18079-89 doi
- 2 10.1074/jbc.M115.639690.
- 3 49. Ninomiya K, Kataoka N and Hagiwara M. Stress-responsive maturation of
- 4 Clk1/4 pre-mRNAs promotes phosphorylation of SR splicing factor. *The Journal*
- 5 *of cell biology* 2011;195(1):27-40 doi 10.1083/jcb.201107093.
- 6 50. Long Y, Sou WH, Yung K WY, Liu H, Wan SWC, Li Q, *et al.* Distinct
- 7 mechanisms govern the phosphorylation of different SR protein splicing factors. *J*
- 8 *Biol Chem* 2018 doi 10.1074/jbc.RA118.003392.
- 9 51. Shinde MY, Sidoli S, Kulej K, Mallory MJ, Radens CM, Reicherter AL, *et*
- 10 *al.* Phosphoproteomics reveals that glycogen synthase kinase-3 phosphorylates
- 11 multiple splicing factors and is associated with alternative splicing. *J Biol Chem*
- 12 2017;292(44):18240-55 doi 10.1074/jbc.M117.813527.
- 13 52. Prasad J, Colwill K, Pawson T and Manley JL. The protein kinase Clk/Sty
- 14 directly modulates SR protein activity: both hyper- and hypophosphorylation
- 15 inhibit splicing. *Mol Cell Biol* 1999;19(10):6991-7000.
- 16 53. Cao W, Jamison SF and Garcia-Blanco MA. Both phosphorylation and
- 17 dephosphorylation of ASF/SF2 are required for pre-mRNA splicing in vitro. *RNA*
- 18 1997;3(12):1456-67.
- 19 54. Hong DS, Kurzrock R, Naing A, Wheler JJ, Falchook GS, Schiffman JS, *et*
- 20 *al.* A phase I, open-label, single-arm, dose-escalation study of E7107, a
- 21 precursor messenger ribonucleic acid (pre-mRNA) splicesome inhibitor
- 22 administered intravenously on days 1 and 8 every 21 days to patients with solid
- 23 tumors. *Investig New Drugs* 2014;32(3):436-44 doi 10.1007/s10637-013-0046-5.
- 24 55. Tyanova S, Temu T, and Cox J. The MaxQuant computational platform for
- 25 mass spectrometry-based shotgun proteomics, *Nat Protocols* 2016;11:2301-19.
- 26 56. Szklarczyk D, Morris JH, Cook H, Kuhn M, Wyder S, Simonovic M, *et al.*
- 27 The STRING database in 2017: quality-controlled protein-protein association
- 28 networks, made broadly accessible. *Nucleic Acids Res.* 2017;45:D362-D368.
- 29 57. Chen E Y, Tan CM, Kou Y, Duan Q, Wang Z, Meirelles GV, *et al.* Enrichr:
- 30 interactive and collaborative HTML5 gene list enrichment analysis tool. *BMC*
- 31 *Bioinformatics* 2013;128:1-14.

- 1 58. Vizcaíno JA, Csordas A, del-Toro N, Dienes JA, Griss J, Lavidas I, *et al.*
- 2 2016 update of the PRIDE database and related tools. *Nucleic Acids Res.*
- 3 2016;44:D447-56.
- 4

## 1 Main Figure Titles and Legends

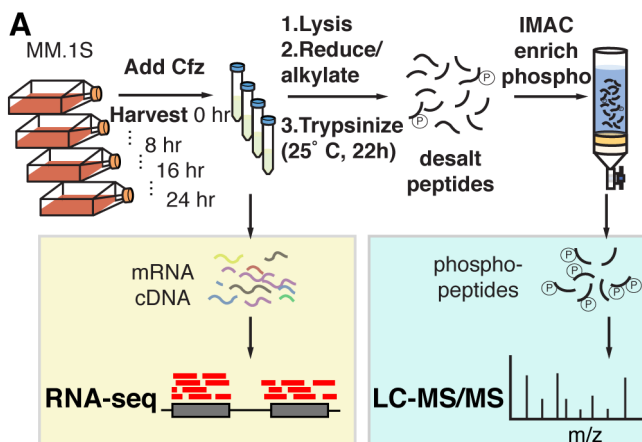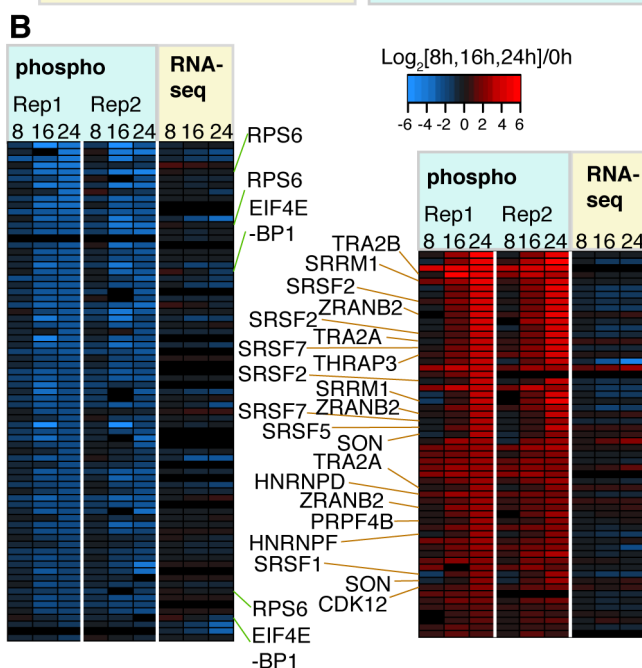

2

3 **Figure 1. Unbiased phosphoproteomic timecourse analysis of MM.1S cells treated**

4 **with the PI carfilzomib (Cfz).** **A.** Workflow of timecourse treatment of MM.1S cells with

5 Cfz. Cells were allotted for both RNA-seq analysis and LC-MS/MS. **B.** Downregulated

6 (left) and upregulated (right) log<sub>2</sub> transformed phospho-peptide MS1 intensities for two

7 technical replicates of proteins with unchanged transcript levels (RNA-seq). Labels

8 highlight dephosphorylation of RPS6 and EIF4EBP1 on the left and phosphorylation of

9 splicing-related proteins on the right.

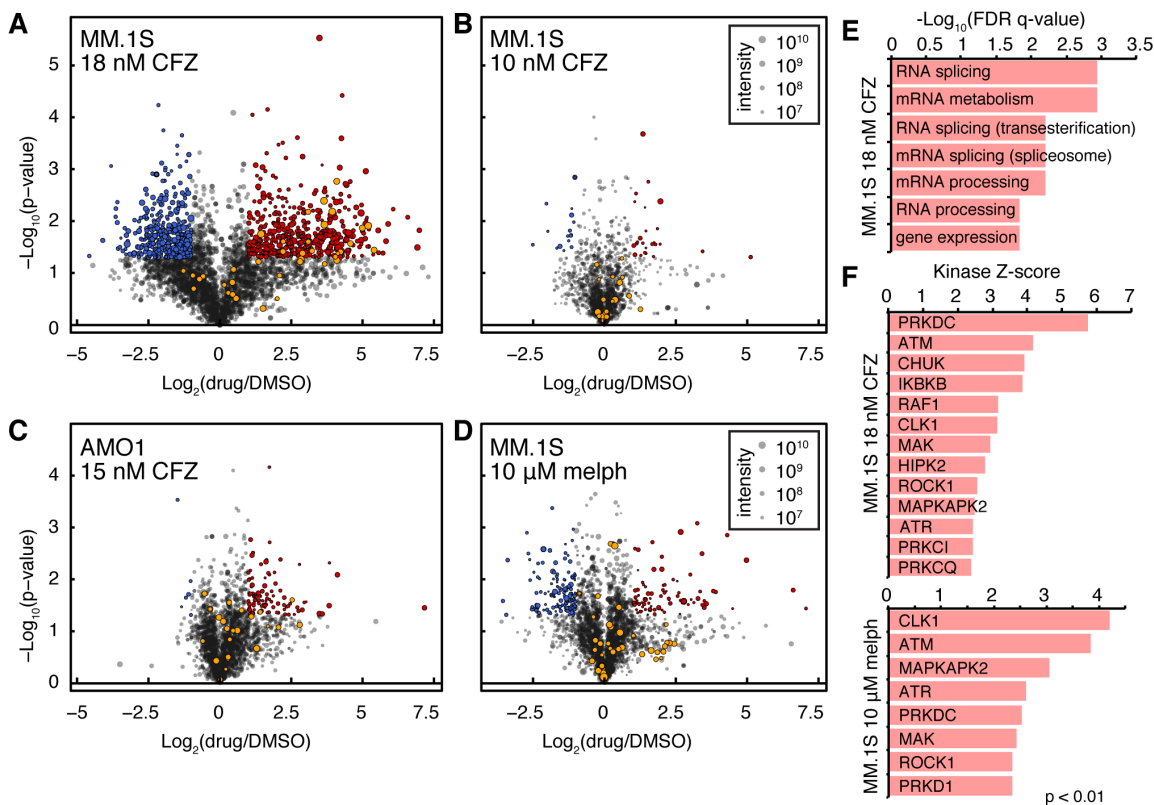

1  
2 **Figure 2. Czf induces phosphorylation of splicing factors in a dose-responsive**  
3 **manner. A-D.** Volcano plots of log<sub>2</sub> transformed ratios of phosphosite abundances  
4 between **A.** MM.1S treated with 18 nM Czf, **B.** 10 nM Czf, or **D.** or 10  $\mu$ M melphalan  
5 compared to DMSO and **C.** AMO-1 with 15 nM Czf compared to DMSO. Significant  
6 upregulated sites are in red, while downregulated are in blue (>2-fold change,  $p < 0.05$ ).  
7 SRSF related sites are in orange. Circle size corresponds to summed SILAC intensities.  
8 **E.** Top-ranked GO terms for genes with significantly upregulated phosphosites in MM.1S  
9 cells treated with 18 nM Czf. **F.** Top-ranked KSEA activated kinases (with at least 5  
10 substrates) for MM.1S treated with 18 nM Czf (top) and 10  $\mu$ M melphalan (bottom).

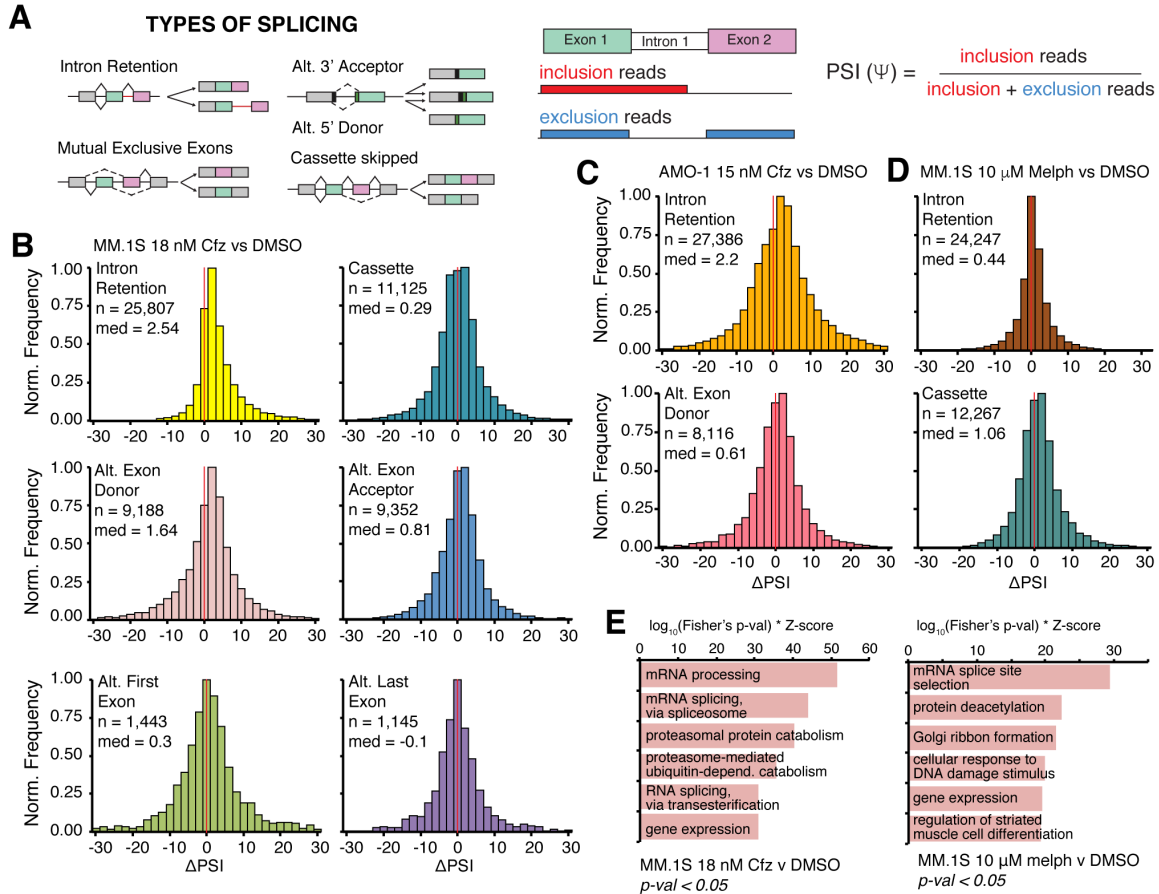

1  
2  
3  
4  
5  
6  
7  
8  
9  
10  
11  
12

**Figure 3. Cfz treatment leads to prominent intron retention.** **A.** Cartoon description of alternative splicing event (ASE) types and description of  $\Delta$ PSI. **B.** Histograms of  $\Delta$ PSI for JuncBASE identified ASEs in MM.1S treated with 18 nM Cfz stratified according to type of splicing event (IR = yellow, alt. exon cassette = teal, alt. exon donor (5' splice site) = pink, alt. exon acceptor (3' splice site) = blue, alt. first exon = green, alt. last exon = purple). Bin = 2, red line indicates  $\Delta$ PSI = 0. **C.** Histograms of  $\Delta$ PSI for all IR events (top) and Alt. Exon Donor events (bottom) in AMO-1 treated with 15 nM Cfz **D.** Histograms of  $\Delta$ PSI for all IR events (top) and Alt. cassette events (bottom) in MM.1S treated with 10  $\mu$ M melphalan (right). **E.** Top ranked GO enrichment terms for significant ( $p < 0.05$ ) ASEs for MM.1S cells treated with 18 nM Cfz (left) or with 10  $\mu$ M melphalan (right).



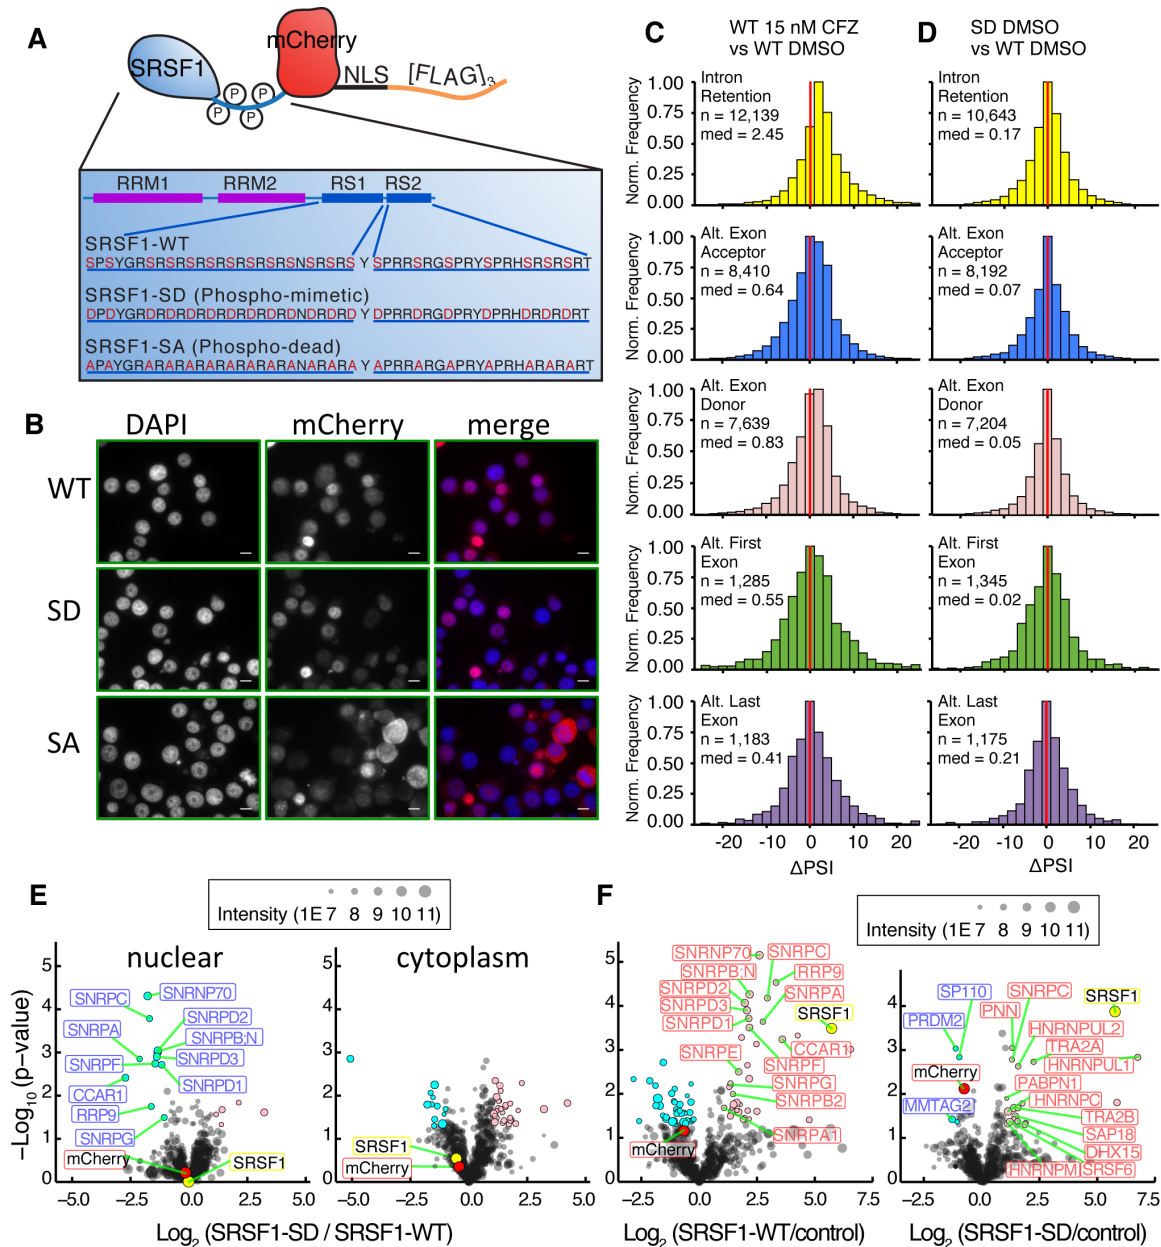

1  
2 **Figure 4. Modeling SRSF1 phosphorylation in MM drives interactome dynamics**  
3 **but not global splicing changes.** **A.** Cartoon of protein architecture for exogenous  
4 SRSF1-NLS-mCherry-[FLAG]<sub>3</sub>. **B.** Epi-fluorescent imaging of DAPI stained AMO-1  
5 expressing mCherry labeled SRSF1-WT (top), SRSF1-SD (middle), and SRSF1-SA  
6 (bottom). Scalebar represents 10 μm. **C and D.** Histograms of ΔPSI for IR, alt. exon  
7 donor, alt. exon acceptor, alt. first exon, alt. last exon ASEs when comparing differential  
8 splicing of AMO-1 expressing **C.** SRSF1-WT treated with 15 nM Cfz to DMSO and **D.** SD  
9 to WT. **E.** Volcano plots indicating differential interactors of SD compared to WT in both  
10 the nucleus and cytoplasm. **F.** Volcano plots of WT or SD when compared to control

- 1 (NLS-mCherry-[FLAG]<sub>3</sub>) in AMO-1 nucleus reveal SD exclusion from spliceosome.
- 2 Significant enriched proteins in pink, unenriched proteins in cyan ( $p < 0.05$ ,  $\geq 2$ -fold
- 3 change). Circle size corresponds to summed LFQ intensities. mCherry ratio is red and
- 4 SRSF1 ratio is yellow.

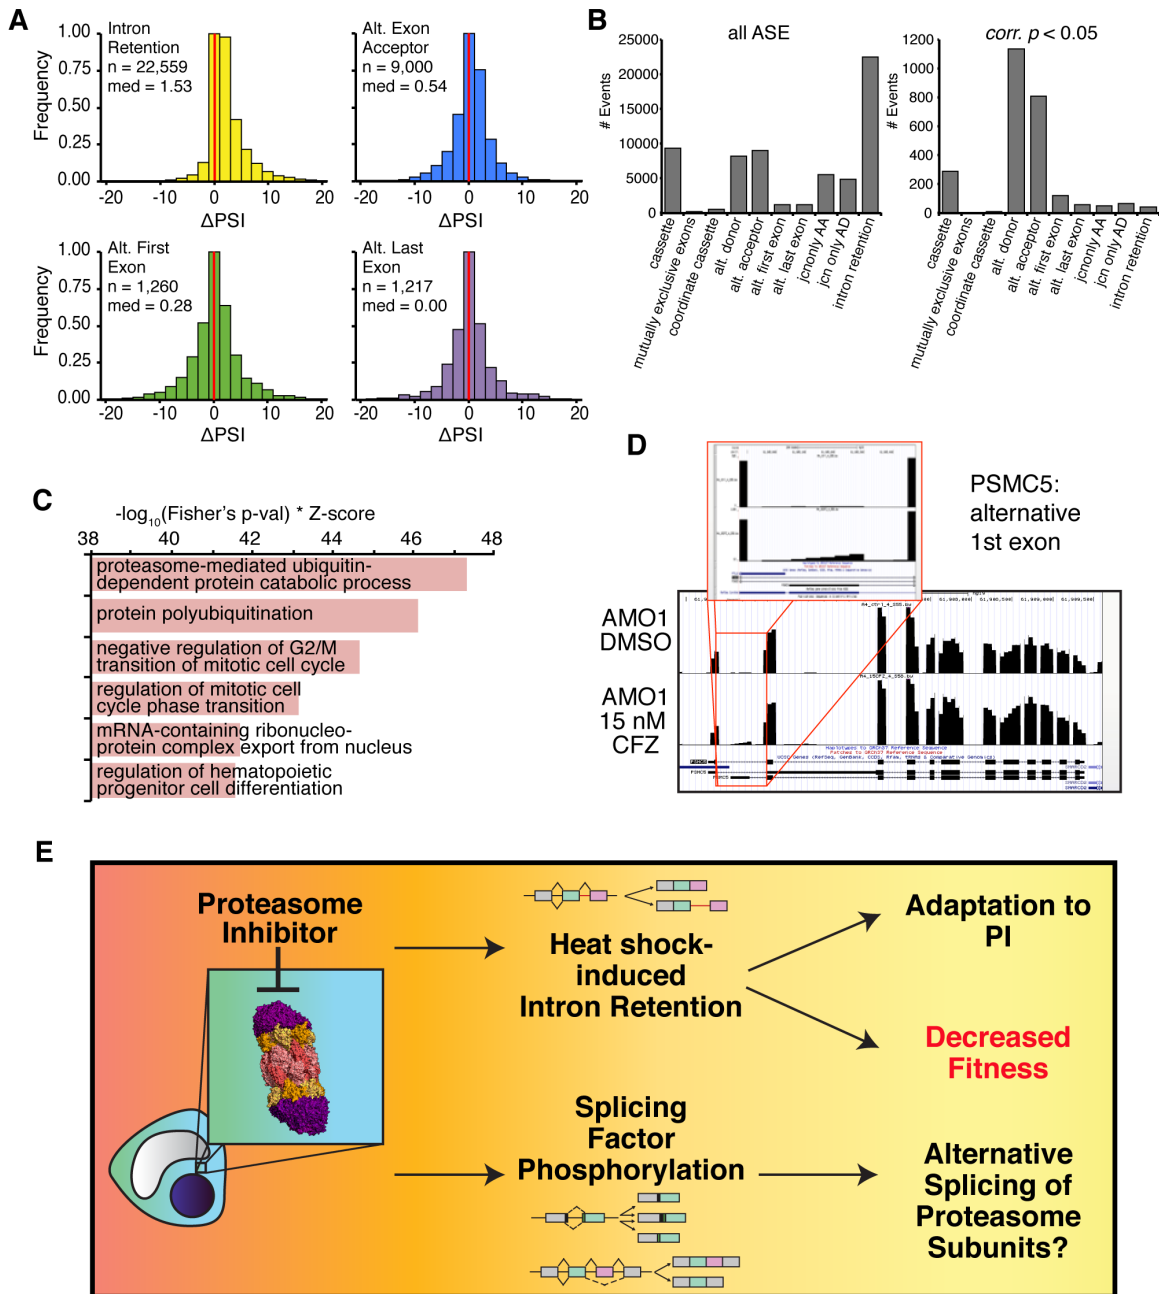

1

2 **Figure 5. Combined SRSF1 constructs validate the splicing phenotype after Cfz. A.**

3 Histograms of  $\Delta\text{PSI}$  in pooled analysis of parental AMO-1, AMO-1 SRSF1-WT, SD, and

4 SA expressing cells treated with 15 nM Cfz compared to DMSO. **B.** Graph shows total

5 number of events ( $n = 62,474$ ) for each ASE type (left) and only the significant (FDR-

6 corrected  $p < 0.05$ ) events ( $n = 2,575$ ) for each type (right). **C.** Top ranked GO

7 enrichment terms of all genes involved in significant ASEs, regardless of type. **D.**

8 Snapshot of UCSC Genome Browser Bar graph compares RNA-seq counts for the

9 proteasomal subunit *PSMC5* between AMO-1 treated with 15 nM Cfz (bottom) and with

- 1 DMSO (top). Inset displays sequencing counts showing alternative first exon. **E.** Model
- 2 of new PI mechanism of action found in MM.

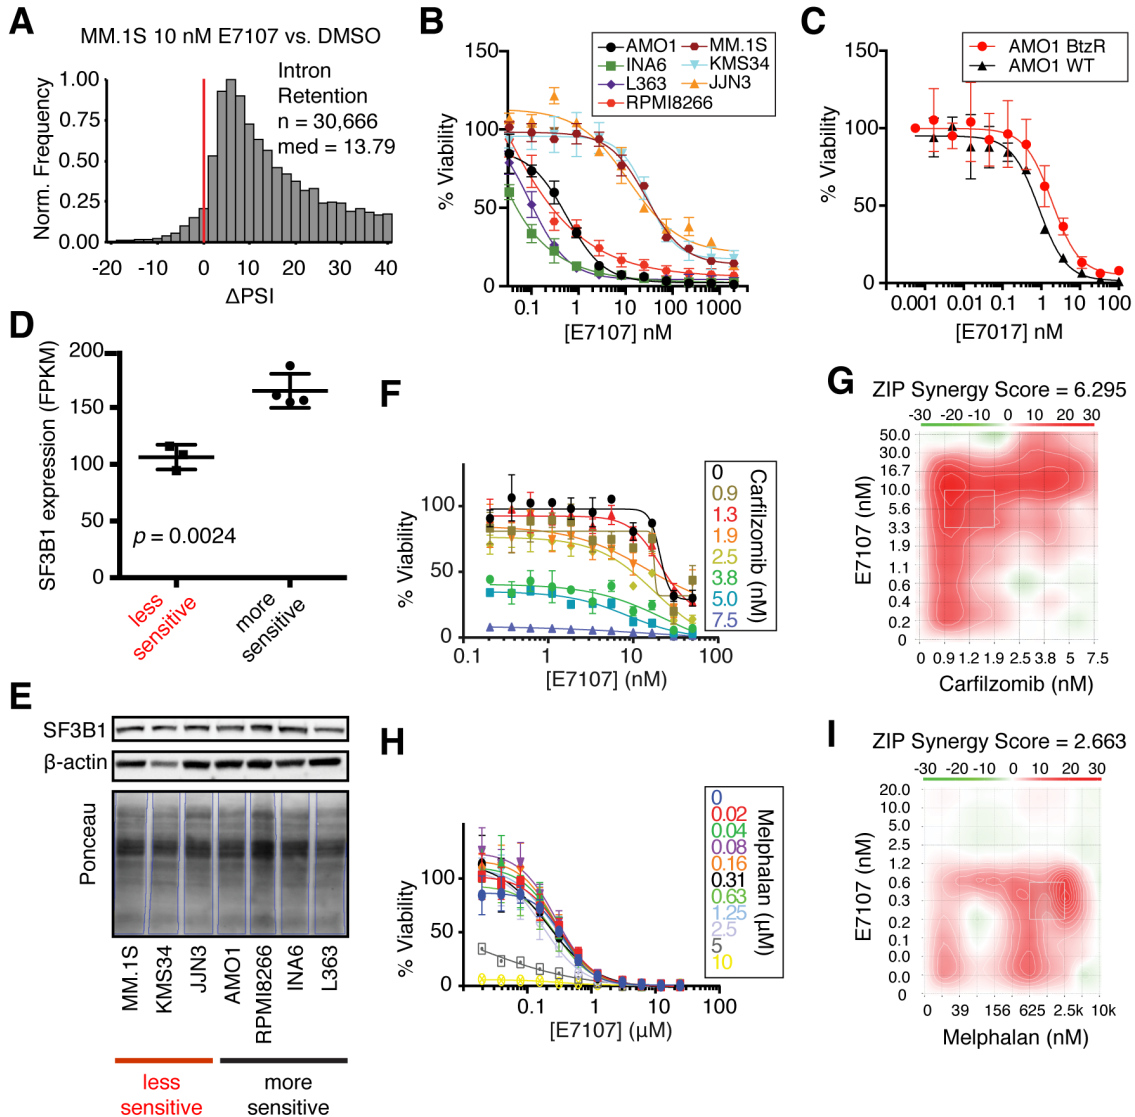

1  
 2 **Figure 6. The catalytic spliceosome inhibitor E7107 induces IR and has potent**  
 3 **anti-MM activity *in vitro*.** **A.** ΔPSI histogram of IR events for MM.1S treated with 10 nM  
 4 E7107 for 6 hr with respect to DMSO. Bin = 2 and red line at ΔPSI = 0. **B.** Cell viability  
 5 curves compare a panel of 7 MM cell lines treated with E7107 for 48 hr (n = 4; mean +/-  
 6 S.D.). **C.** Cell viability comparison of WT AMO-1 and PI-resistant AMO-1 cell line (BtzR)  
 7 when treated with E7107 (n = 4; mean +/- S.D.) **D.** Evaluation of SF3B1 expression by  
 8 RNA-seq ([www.keatslab.org](http://www.keatslab.org), mean +/- S.D.) and **E.** Western blot across more E7107-  
 9 sensitive (AMO-1, INA6, L363, and RPMI8266) and less E7107-sensitive (MM.1S,  
 10 KMS34, JJJ3) cell lines. **F.** Cell viability curves of MM.1S combination therapy with  
 11 E7107 and Czf (n = 4; mean +/- S.D.) **G.** 2-D heatmap of ZIP synergy-scored landscape  
 12 from Czf and E7107 combination study. Red = synergy; green = antagonism; white =

- 1 additive. Overall ZIP score of 6.295 suggests strong synergy. **H and I.** Same as **F.** and
- 2 **G.** but for melphalan + E7107 combination. Overall ZIP synergy score of 2.663 denotes
- 3 weaker synergy than with Cfz.

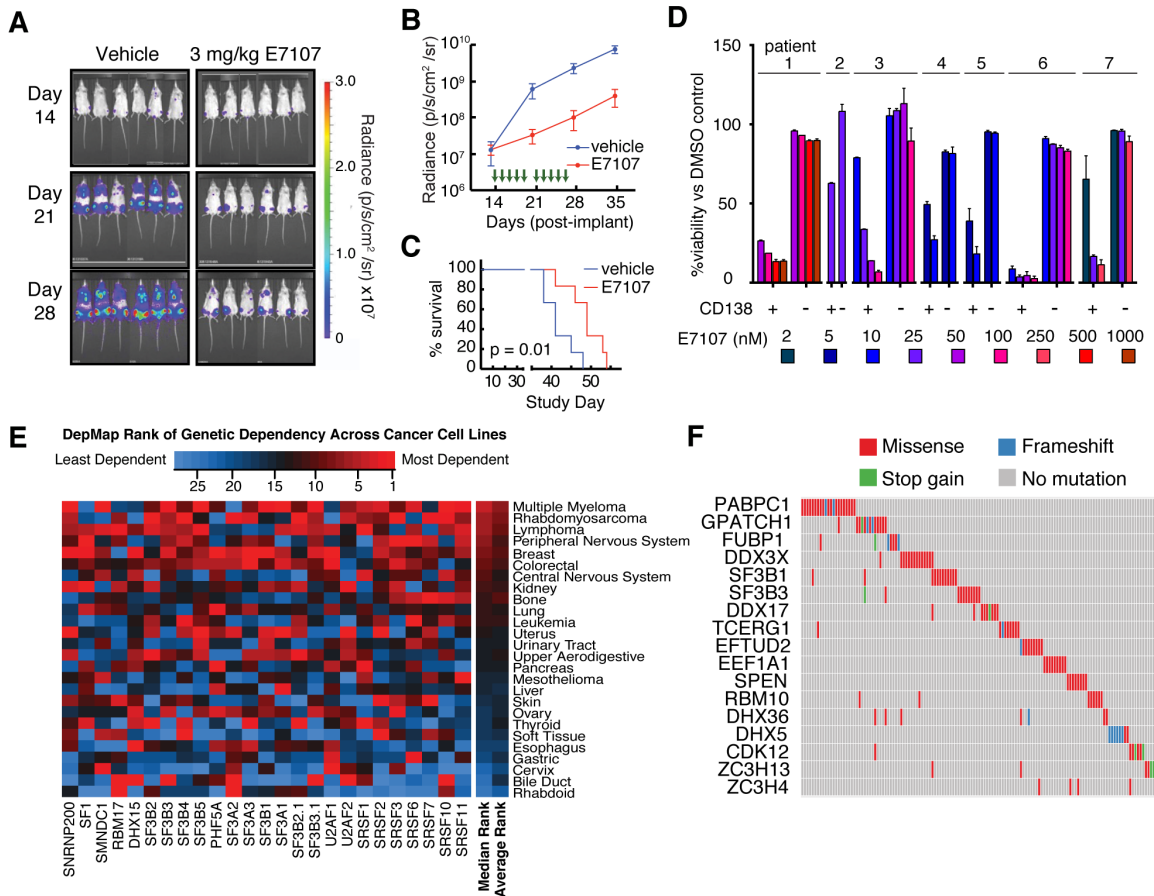

1  
2 **Figure 7. Inhibition of the spliceosome is a promising therapeutic strategy in**  
3 **myeloma. A-B.** Bioluminescence imaging of luc-labeled MM.1S cells implanted in mice  
4 treated with either vehicle (left, n = 6) or 3 mg/kg E7107 (right, n = 6). Green arrows  
5 indicate days when drug was administered (14-18, 21-25). **C.** E7107 leads to significant  
6 improvement in murine survival ( $p = 0.01$  by log-ranked test) **D.** Treatment of primary  
7 bone marrow aspirate samples from PI-refractory myeloma patients at various doses of  
8 E7107 for 24 hr shows significant cytotoxicity to CD138+ MM plasma cells at low-nM  
9 concentrations but minimal effects on other (CD138-) hematopoietic cells (n = 2  
10 technical replicates; mean +/- S.D.). **E.** Heatmap of CRISPR-Cas9 essentiality screen  
11 data analysis in the Cancer Dependency Map ([www.depmap.org](http://www.depmap.org); **Avana 18Q4** release)  
12 of core spliceosomal subunits among all tested tumor cell types. **F.** Analysis of MMRF  
13 CoMMpass data ([research.themmr.org](http://research.themmr.org); release **IA11**) summarizing mutations with  
14 possible functional effects in numerous splicing-related factors, as defined by Seiler *et*  
15 *al.* (46), within MM patient plasma cells.
